## Testing Theoretical Minimal Genomes Using whole-cell Models

Joshua Rees-Garbutt<sup>1,2</sup>, Claire Grierson<sup>1,2,\*</sup> and Lucia Marucci<sup>1,3,4,\*</sup>

1. BrisSynBio, University of Bristol, Bristol BS8 1TQ, UK;
2. School of Biological Sciences, University of Bristol, Bristol Life Sciences Building, 24 Tyndall Avenue, Bristol, BS8 1TQ, UK;
3. Department of Engineering Mathematics, University of Bristol, Bristol BS8 1UB, UK;
4. School of Cellular and Molecular Medicine, University of Bristol, Bristol BS8 1UB, UK;

+ Co-last authors \* Corresponding authors

Corresponding authors: Prof. Claire Grierson ([claire.grierson@bristol.ac.uk](mailto:claire.grierson@bristol.ac.uk)), Dr. Lucia Marucci ([lucia.marucci@bristol.ac.uk](mailto:lucia.marucci@bristol.ac.uk))

### Abstract

Numerous authors have pondered what the minimal gene set for life might be and many hypothetical minimal gene sets have been proposed, including at least 10 for *Mycoplasma genitalium* (*M.genitalium*). None of these have been reported to be tested *in-vivo* or *in-silico*. *In-vivo* testing would be extremely difficult as *M.genitalium* is very difficult to grow in the laboratory and laborious to engineer. However, the *M.genitalium* whole-cell model provides the first opportunity to test them *in-silico*. We simulated eight hypothetical minimal gene sets from the literature, and found none could produce *in-silico* cells that could grow and divide. Using previous research on *in-silico* gene essentiality in *M.genitalium*, we were able to repair the sets by reintroducing select genes, so that they produced dividing *in-silico* cells.

### Introduction

Genome engineering builds on historical gene essentiality research. The sequencing of small bacterial genomes<sup>1,21,2</sup> led to comparative genomics, initially between pairs of bacteria<sup>33</sup>, then greater numbers of bacteria as genome sequencing increased, which led to the development of minimal gene sets<sup>3-123-12</sup>.

Minimal gene sets are lists of genes selected to produce a minimal genome, but have yet to be tested. A minimal genome is a reduced genome containing only the genetic material essential for survival, with an appropriately rich medium and no external

stresses. No single gene can be removed without loss of viability<sup>1313</sup>. Minimal gene sets and minimal genomes focus on protein-coding genes ignoring: essential promoter regions, tRNAs, small noncoding RNAs<sup>1414</sup>, regulatory noncoding sequences<sup>1010</sup>, and the physical layout of the genome<sup>10,1510,15</sup>. Predictions for the size of a viable, generic, bacterial minimal genome range from 151 genes<sup>77</sup>, to between 300 and 500 genes, though up to 1000 genes if the cell is required to survive on minimal media<sup>1515</sup>. As the ratio of genes to base pairs is approximately one gene per kilobase<sup>1616</sup>, the size expectation of a minimal genome is between 0.15mb and 0.5mb.

*M.genitalium* is the focal point of minimal gene set creation due it is naturally small genome size and available sequenced genome<sup>22</sup>. It has the smallest genome of an independent organism in nature at 0.58mb and 525 genes<sup>22</sup>. As a human parasite that has shed functional redundancies over evolutionary time it has proved a useful starting point for comparative genomics. The estimated number of essential genes ranges from: 256 by comparative genomics<sup>33</sup>; 388 by global transposon mutagenesis and comparative genomics<sup>44</sup>; and 381 by single gene knockout<sup>66</sup>. Extrapolating a comparison of single gene deletions of *Mycoplasma* genomes and the genome of *JCVI-syn3.0*, resulted in a prediction of 413 genes for a minimal *Mycoplasma* genome<sup>1313</sup>. The number of genes that do not have an annotated function has been reported as 111<sup>44</sup> and 134<sup>66</sup>. The *M.genitalium* genome has been reproduced elsewhere, constructed from 25 synthetic parts within yeast<sup>1717</sup>. It is also the subject of the first computational whole-cell model<sup>88</sup>. Minimal gene sets are constructed using three different approaches: protocell development<sup>1818</sup>; universal minimal genome theory or comparative genomics; and single gene essentiality research.

A recent review<sup>1919</sup> updates gene essentiality from a binary categorisation to a gradient with four categories: no essentiality (if dispensable in all contexts), low essentiality (if dispensable in some contexts, i.e. redundant essential and complexes), high essentiality (if indispensable in most contexts, i.e. protective essential), and complete essentiality (if indispensable in all contexts).

Minimal gene sets designed as protocells are not expected to function as full cells, instead functioning as a self-replicating, membrane-encapsulated collection of biomolecules<sup>77</sup>, with the sets containing very small numbers of genes.

The universal minimal genome concept is a theory that comparing bacterial genome sequences for common genes will give a gene list that represents essential functions of the cell, and may resemble LUCA (the Last Universal Common Ancestor for life on Earth)<sup>2020</sup>. This has been used to construct minimal gene sets, however, as the number of genomes sequenced have increased, the hope around discovering a universal minimal genome strictly from genetic sequences has decreased. Lagesen<sup>2121</sup> found that only four genes are recognisably conserved among 1000 bacterial genomes, and even among the evolutionarily reduced *Mycoplasmas* only 196 orthologs (genes that have evolved differently from an ancestral gene but are still recognisable related and retain the same function) were found across the 20 species sequenced<sup>1313</sup>. This apparent low conservation of cellular functions is due to non-orthologous gene displacements, independently evolved or diverged proteins that perform the same function but are not recognisably related<sup>3,133,13</sup>. This means that minimal gene sets designed by the universal minimal genome concept or comparative genomics (subsequently referred to as comparative genomics) could remove a large numbers of genes essential to *M.genitalium* depending on the number of bacterial genomes compared, as the genes are not required by the other bacterial species. Fewer genes may be removed if a smaller number of genomes are compared. This comparative work continues to be built on computationally, analysing the growing number of genomic data sets for key features that could be used to match non-orthologous gene displacements<sup>2222</sup>.

Minimal gene sets designed using single gene essentiality experiments should, in theory, not remove any essential genes, but do fall prey to issues with transposon mutagenesis, with differing transposon variants, antibiotic resistance genes, and growth periods producing different essentiality classification for genes<sup>23,2423,24</sup>.

There are eight minimal gene sets in the literature with detailed gene lists (Table 1). Two are designed as protocells: Tomita *et al.* <sup>55</sup> and Church *et al.* <sup>77</sup>. Three are designed from comparative genomics: Mushegian and Koonin <sup>33</sup>, Huang *et al.* <sup>99</sup>, and Gil <sup>10,1110,11</sup>. Three are designed from single gene essentiality experiments: Hutchison *et al.* <sup>44</sup>, Glass *et al.* <sup>66</sup>, and Karr *et al.* <sup>88</sup>. Due to the difficulty of using *M.genitalium* in the lab <sup>2525</sup>, combined with its long replication time of 12 - 15 hours <sup>13,26,2713,26,27</sup>, none of these minimal gene sets have been tested as minimal genomes, even with modern techniques <sup>2626</sup>.

## Results

Ten minimal gene sets were found in the literature that were designed with *M.genitalium* genes <sup>3-123-12</sup>, however two sets <sup>11,1211,12</sup> were excluded as they were considered derivative of the Gil 2014 set <sup>1010</sup> being identical apart from four genes in the Shuler *et al.* set (MG\_056, MG\_146, MG\_388, MG\_391) and four genes not in the Gil *et al.* 2004 set (MG\_009, MG\_091, MG\_132, MG\_460). To begin testing the eight minimal gene sets to see if they produced *in-silico* dividing cells, we had first to adapt each set for use in simulations, removing any genes unmodelled in the *M.genitalium* whole-cell model.

| Minimal Gene Set                           | Code Name   | Design Methodology    |
|--------------------------------------------|-------------|-----------------------|
| Mushegian and Koonin 1996 <sup>33</sup>    | Bethesda    | Comparative Genomics  |
| Hutchison <i>et al.</i> 1999 <sup>44</sup> | Rockville   | Single Gene Deletions |
| Tomita <i>et al.</i> 1999 <sup>55</sup>    | Fujisawa    | Protocell             |
| Glass <i>et al.</i> 2006 <sup>66</sup>     | Rockville 2 | Single Gene Deletions |
| Forster and Church 2006 <sup>77</sup>      | Nashville   | Protocell             |
| Karr <i>et al.</i> 2012 <sup>88</sup>      | Stanford    | Single Gene Deletions |
| Huang <i>et al.</i> 2013 <sup>99</sup>     | Guelph      | Comparative Genomics  |
| Gil 2014 <sup>1010</sup>                   | Valencia    | Comparative Genomics  |

**Table 1.** Code names for the minimal gene sets from the literature.

To prevent confusion, we named the sets after the main location of where the set was constructed (Table 1). The Bethesda set is a comparison of *M.genitalium* protein sequences to *Haemophilus influenzae* (representatives of gram-positive and gram-negative bacteria) <sup>33</sup>. The Rockville set is the result of applying global transposon

mutagenesis to *M.genitalium in-vivo* to identify non-essential genes <sup>44</sup>. The Fujisawa set is an *in-silico* model of a hypothetical cell constructed from 127 *M.genitalium* genes using the E-Cell software <sup>55</sup>. The Rockville 2 set is an expansion of the original global transposon mutagenesis research on *M.genitalium*, with properly conducted isolation and characterisation of pure clonal populations <sup>66</sup>. The Nashville set is a list of 151 *E.coli* genes (compared to *M.genitalium* genes within the paper) to produce a chemical system capable of replication and evolution <sup>77</sup>. The Stanford set is the result of *in-silico* single gene knockouts conducted using the *M.genitalium* whole-cell model <sup>88</sup>. The Guelph set is the result of a comparative genomics analysis of 186 bacterial genomes <sup>99</sup>. The Valencia set compared the genome of *M.genitalium* with genetic data of five insect endosymbionts <sup>1010</sup>.

The sets Nashville, Fujisawa and Stanford are as they appear in the literature, the others needed adapting by removing genes as follows (Table 2). Guelph had seven genes removed: five because they are not in the whole-cell model, one copy of MG\_231 was removed as it was originally listed twice, and MG\_420 is not present in the whole-cell model. Valencia had eight genes removed: six that are not present in the *M.genitalium* whole-cell model, one copy of MG\_231 was removed as it was originally listed twice and MG\_420 is not in the whole-cell model. Bethesda had 15 genes removed: 12 as they are not in the whole-cell model, MG\_297 and MG\_336 were reduced to a single copy each as they were both originally listed twice, and MG\_420 is not in the whole-cell model. Rockville had 41 genes removed as they are not in the whole-cell model. Rockville 2 had 44 genes removed as they were not in the whole-cell model.

As expected, the minimal gene sets designed as protocells (Nashville, Fujisawa) have the smallest predicted *in-silico* genome size. Of the comparative genomics minimal gene sets, Guelph is substantially smaller than Valencia and Bethesda due to comparing 186 bacterial species for common genes <sup>99</sup>, with Valencia only six species <sup>1010</sup>, and Bethesda directly comparing two species <sup>33</sup>. The single gene deletion minimal gene sets (Stanford, Rockville, Rockville 2) have similar numbers of *in-vivo* deletions, but Rockville and Rockville 2 have the highest numbers of genes that are missing from the *M.genitalium* whole-cell model. This is due to the nature of exploratory genetic

work, genes can be disrupted *in-vivo* if the genetic sequence is known. To be implemented *in-silico*, however, the function of the genes also must be known. All the genes in Stanford are contained in the whole-cell model, as the single gene deletions were conducted *in-silico* using the model and so did not target unmodelled genes. The gene content of the minimal gene sets (Table 3) and the required gene deletions to produce these minimal gene sets in the *M.genitalium* whole-cell model (Table 4) are listed.

|                                       | Design approach       | <i>in-vivo</i> genome design size* | Unmodelled genes^ in genome design | Single <i>in-vivo</i> gene deletions* | Unmodelled genes^ in gene deletions | Predicted <i>in-silico</i> genome size* | Predicted gene deletions <i>in-silico</i> * |
|---------------------------------------|-----------------------|------------------------------------|------------------------------------|---------------------------------------|-------------------------------------|-----------------------------------------|---------------------------------------------|
| Nashville                             | Protocell             | 89                                 | 0                                  | -                                     | -                                   | 89                                      | 270                                         |
| Fujisawa                              | Protocell             | 98                                 | 0                                  | -                                     | -                                   | 98                                      | 261                                         |
| Guelph                                | Comparative Genomics  | 123                                | 5                                  | -                                     | -                                   | 118                                     | 241                                         |
| Valencia                              | Comparative Genomics  | 180                                | 6                                  | -                                     | -                                   | 174                                     | 185                                         |
| Bethesda                              | Comparative Genomics  | 253                                | 12                                 | -                                     | -                                   | 241                                     | 118                                         |
| Stanford                              | Single Gene Deletions | -                                  | -                                  | 117                                   | 0                                   | 242                                     | 117                                         |
| Rockville 2                           | Single Gene Deletions | -                                  | -                                  | 101                                   | 44                                  | 302                                     | 57                                          |
| Rockville                             | Single Gene Deletions | -                                  | -                                  | 94                                    | 41                                  | 306                                     | 53                                          |
| <i>M.genitalium</i> whole-cell Model* | -                     | -                                  | 124                                | -                                     | -                                   | 359                                     | -                                           |
| <i>M.genitalium in-vivo</i> *         | -                     | 483                                |                                    | -                                     | -                                   | -                                       | -                                           |

**Table 2.** Minimal Gene Sets from the literature, compared with *M.genitalium in-vivo* and the whole-cell model. *M.genitalium* has 42 RNA-coding genes that are not included in this table. \* = protein-coding genes. ^ = due to unknown function.

|        | Bethesda | Rockville | Fujisawa | Rockville 2 | Nashville | Stanford | Guelph | Valencia | Agreed* |
|--------|----------|-----------|----------|-------------|-----------|----------|--------|----------|---------|
| MG_001 |          |           |          |             |           |          |        |          |         |
| MG_002 |          |           |          |             |           |          |        |          |         |
| MG_003 |          |           |          |             |           |          |        |          |         |
| MG_004 |          |           |          |             |           |          |        |          |         |
| MG_005 |          |           |          |             |           |          |        |          |         |
| MG_006 |          |           |          |             |           |          |        |          |         |
| MG_007 |          |           |          |             |           |          |        |          |         |
| MG_008 |          |           |          |             |           |          |        |          |         |
| MG_009 |          |           |          |             |           |          |        |          |         |
| MG_010 |          |           |          |             |           |          |        |          |         |
| MG_011 |          |           |          |             |           |          |        |          |         |
| MG_012 |          |           |          |             |           |          |        |          |         |
| MG_013 |          |           |          |             |           |          |        |          |         |
| MG_014 |          |           |          |             |           |          |        |          |         |
| MG_015 |          |           |          |             |           |          |        |          |         |
| MG_018 |          |           |          |             |           |          |        |          |         |
| MG_019 |          |           |          |             |           |          |        |          |         |
| MG_020 |          |           |          |             |           |          |        |          |         |
| MG_021 |          |           |          |             |           |          |        |          |         |
| MG_022 |          |           |          |             |           |          |        |          |         |
| MG_023 |          |           |          |             |           |          |        |          |         |
| MG_024 |          |           |          |             |           |          |        |          |         |
| MG_025 |          |           |          |             |           |          |        |          |         |
| MG_026 |          |           |          |             |           |          |        |          |         |
| MG_027 |          |           |          |             |           |          |        |          |         |
| MG_028 |          |           |          |             |           |          |        |          |         |
| MG_029 |          |           |          |             |           |          |        |          |         |
| MG_030 |          |           |          |             |           |          |        |          |         |
| MG_031 |          |           |          |             |           |          |        |          |         |
| MG_032 |          |           |          |             |           |          |        |          |         |
| MG_033 |          |           |          |             |           |          |        |          |         |
| MG_034 |          |           |          |             |           |          |        |          |         |
| MG_035 |          |           |          |             |           |          |        |          |         |
| MG_036 |          |           |          |             |           |          |        |          |         |
| MG_037 |          |           |          |             |           |          |        |          |         |
| MG_038 |          |           |          |             |           |          |        |          |         |
| MG_039 |          |           |          |             |           |          |        |          |         |
| MG_040 |          |           |          |             |           |          |        |          |         |
| MG_041 |          |           |          |             |           |          |        |          |         |
| MG_042 |          |           |          |             |           |          |        |          |         |
| MG_043 |          |           |          |             |           |          |        |          |         |
| MG_044 |          |           |          |             |           |          |        |          |         |
| MG_045 |          |           |          |             |           |          |        |          |         |
| MG_046 |          |           |          |             |           |          |        |          |         |





|        | Bethesda | Rockville | Fujisawa | Rockville 2 | Nashville | Stanford | Guelph | Valencia | Agreed* |
|--------|----------|-----------|----------|-------------|-----------|----------|--------|----------|---------|
| MG_090 |          |           |          |             |           |          |        |          |         |
| MG_091 |          |           |          |             |           |          |        |          |         |
| MG_092 |          |           |          |             |           |          |        |          |         |
| MG_093 |          |           |          |             |           |          |        |          |         |
| MG_094 |          |           |          |             |           |          |        |          |         |
| MG_095 |          |           |          |             |           |          |        |          |         |
| MG_096 |          |           |          |             |           |          |        |          |         |
| MG_097 |          |           |          |             |           |          |        |          |         |
| MG_098 |          |           |          |             |           |          |        |          |         |
| MG_099 |          |           |          |             |           |          |        |          |         |
| MG_100 |          |           |          |             |           |          |        |          |         |
| MG_101 |          |           |          |             |           |          |        |          |         |
| MG_102 |          |           |          |             |           |          |        |          |         |
| MG_103 |          |           |          |             |           |          |        |          |         |
| MG_476 |          |           |          |             |           |          |        |          |         |
| MG_104 |          |           |          |             |           |          |        |          |         |
| MG_105 |          |           |          |             |           |          |        |          |         |
| MG_106 |          |           |          |             |           |          |        |          |         |
| MG_107 |          |           |          |             |           |          |        |          |         |
| MG_108 |          |           |          |             |           |          |        |          |         |
| MG_109 |          |           |          |             |           |          |        |          |         |
| MG_110 |          |           |          |             |           |          |        |          |         |
| MG_111 |          |           |          |             |           |          |        |          |         |
| MG_112 |          |           |          |             |           |          |        |          |         |
| MG_113 |          |           |          |             |           |          |        |          |         |
| MG_114 |          |           |          |             |           |          |        |          |         |
| MG_115 |          |           |          |             |           |          |        |          |         |
| MG_116 |          |           |          |             |           |          |        |          |         |
| MG_117 |          |           |          |             |           |          |        |          |         |
| MG_118 |          |           |          |             |           |          |        |          |         |
| MG_119 |          |           |          |             |           |          |        |          |         |
| MG_120 |          |           |          |             |           |          |        |          |         |
| MG_121 |          |           |          |             |           |          |        |          |         |
| MG_122 |          |           |          |             |           |          |        |          |         |
| MG_123 |          |           |          |             |           |          |        |          |         |
| MG_124 |          |           |          |             |           |          |        |          |         |
| MG_125 |          |           |          |             |           |          |        |          |         |
| MG_126 |          |           |          |             |           |          |        |          |         |
| MG_127 |          |           |          |             |           |          |        |          |         |
| MG_128 |          |           |          |             |           |          |        |          |         |
| MG_129 |          |           |          |             |           |          |        |          |         |
| MG_130 |          |           |          |             |           |          |        |          |         |
| MG_131 |          |           |          |             |           |          |        |          |         |
| MG_132 |          |           |          |             |           |          |        |          |         |
| MG_133 |          |           |          |             |           |          |        |          |         |



|        | Bethesda | Rockville | Fujisawa | Rockville 2 | Nashville | Stanford | Guelph | Valencia | Agreed* |
|--------|----------|-----------|----------|-------------|-----------|----------|--------|----------|---------|
| MG_177 |          |           |          |             |           |          |        |          |         |
| MG_178 |          |           |          |             |           |          |        |          |         |
| MG_179 |          |           |          |             |           |          |        |          |         |
| MG_180 |          |           |          |             |           |          |        |          |         |
| MG_181 |          |           |          |             |           |          |        |          |         |
| MG_182 |          |           |          |             |           |          |        |          |         |
| MG_183 |          |           |          |             |           |          |        |          |         |
| MG_184 |          |           |          |             |           |          |        |          |         |
| MG_185 |          |           |          |             |           |          |        |          |         |
| MG_186 |          |           |          |             |           |          |        |          |         |
| MG_187 |          |           |          |             |           |          |        |          |         |
| MG_188 |          |           |          |             |           |          |        |          |         |
| MG_189 |          |           |          |             |           |          |        |          |         |
| MG_190 |          |           |          |             |           |          |        |          |         |
| MG_191 |          |           |          |             |           |          |        |          |         |
| MG_192 |          |           |          |             |           |          |        |          |         |
| MG_194 |          |           |          |             |           |          |        |          |         |
| MG_195 |          |           |          |             |           |          |        |          |         |
| MG_196 |          |           |          |             |           |          |        |          |         |
| MG_197 |          |           |          |             |           |          |        |          |         |
| MG_198 |          |           |          |             |           |          |        |          |         |
| MG_199 |          |           |          |             |           |          |        |          |         |
| MG_200 |          |           |          |             |           |          |        |          |         |
| MG_201 |          |           |          |             |           |          |        |          |         |
| MG_202 |          |           |          |             |           |          |        |          |         |
| MG_203 |          |           |          |             |           |          |        |          |         |
| MG_204 |          |           |          |             |           |          |        |          |         |
| MG_205 |          |           |          |             |           |          |        |          |         |
| MG_206 |          |           |          |             |           |          |        |          |         |
| MG_207 |          |           |          |             |           |          |        |          |         |
| MG_208 |          |           |          |             |           |          |        |          |         |
| MG_209 |          |           |          |             |           |          |        |          |         |
| MG_210 |          |           |          |             |           |          |        |          |         |
| MG_480 |          |           |          |             |           |          |        |          |         |
| MG_481 |          |           |          |             |           |          |        |          |         |
| MG_211 |          |           |          |             |           |          |        |          |         |
| MG_482 |          |           |          |             |           |          |        |          |         |
| MG_212 |          |           |          |             |           |          |        |          |         |
| MG_213 |          |           |          |             |           |          |        |          |         |
| MG_214 |          |           |          |             |           |          |        |          |         |
| MG_215 |          |           |          |             |           |          |        |          |         |
| MG_216 |          |           |          |             |           |          |        |          |         |
| MG_217 |          |           |          |             |           |          |        |          |         |
| MG_218 |          |           |          |             |           |          |        |          |         |
| MG_491 |          |           |          |             |           |          |        |          |         |

|        | Bethesda | Rockville | Fujisawa | Rockville 2 | Nashville | Stanford | Guelph | Valencia | Agreed* |
|--------|----------|-----------|----------|-------------|-----------|----------|--------|----------|---------|
| MG_219 |          |           |          |             |           |          |        |          |         |
| MG_220 |          |           |          |             |           |          |        |          |         |
| MG_221 |          |           |          |             |           |          |        |          |         |
| MG_222 |          |           |          |             |           |          |        |          |         |
| MG_223 |          |           |          |             |           |          |        |          |         |
| MG_224 |          |           |          |             |           |          |        |          |         |
| MG_225 |          |           |          |             |           |          |        |          |         |
| MG_226 |          |           |          |             |           |          |        |          |         |
| MG_227 |          |           |          |             |           |          |        |          |         |
| MG_228 |          |           |          |             |           |          |        |          |         |
| MG_229 |          |           |          |             |           |          |        |          |         |
| MG_230 |          |           |          |             |           |          |        |          |         |
| MG_231 |          |           |          |             |           |          |        |          |         |
| MG_232 |          |           |          |             |           |          |        |          |         |
| MG_233 |          |           |          |             |           |          |        |          |         |
| MG_234 |          |           |          |             |           |          |        |          |         |
| MG_235 |          |           |          |             |           |          |        |          |         |
| MG_236 |          |           |          |             |           |          |        |          |         |
| MG_237 |          |           |          |             |           |          |        |          |         |
| MG_238 |          |           |          |             |           |          |        |          |         |
| MG_239 |          |           |          |             |           |          |        |          |         |
| MG_240 |          |           |          |             |           |          |        |          |         |
| MG_241 |          |           |          |             |           |          |        |          |         |
| MG_242 |          |           |          |             |           |          |        |          |         |
| MG_243 |          |           |          |             |           |          |        |          |         |
| MG_244 |          |           |          |             |           |          |        |          |         |
| MG_245 |          |           |          |             |           |          |        |          |         |
| MG_246 |          |           |          |             |           |          |        |          |         |
| MG_247 |          |           |          |             |           |          |        |          |         |
| MG_248 |          |           |          |             |           |          |        |          |         |
| MG_249 |          |           |          |             |           |          |        |          |         |
| MG_250 |          |           |          |             |           |          |        |          |         |
| MG_251 |          |           |          |             |           |          |        |          |         |
| MG_252 |          |           |          |             |           |          |        |          |         |
| MG_253 |          |           |          |             |           |          |        |          |         |
| MG_254 |          |           |          |             |           |          |        |          |         |
| MG_255 |          |           |          |             |           |          |        |          |         |
| MG_494 |          |           |          |             |           |          |        |          |         |
| MG_256 |          |           |          |             |           |          |        |          |         |
| MG_257 |          |           |          |             |           |          |        |          |         |
| MG_258 |          |           |          |             |           |          |        |          |         |
| MG_259 |          |           |          |             |           |          |        |          |         |
| MG_260 |          |           |          |             |           |          |        |          |         |
| MG_261 |          |           |          |             |           |          |        |          |         |
| MG_262 |          |           |          |             |           |          |        |          |         |

|        | Bethesda | Rockville | Fujisawa | Rockville 2 | Nashville | Stanford | Guelph | Valencia | Agreed* |
|--------|----------|-----------|----------|-------------|-----------|----------|--------|----------|---------|
| MG_498 |          |           |          |             |           |          |        |          |         |
| MG_263 |          |           |          |             |           |          |        |          |         |
| MG_264 |          |           |          |             |           |          |        |          |         |
| MG_265 |          |           |          |             |           |          |        |          |         |
| MG_266 |          |           |          |             |           |          |        |          |         |
| MG_267 |          |           |          |             |           |          |        |          |         |
| MG_268 |          |           |          |             |           |          |        |          |         |
| MG_269 |          |           |          |             |           |          |        |          |         |
| MG_270 |          |           |          |             |           |          |        |          |         |
| MG_271 |          |           |          |             |           |          |        |          |         |
| MG_272 |          |           |          |             |           |          |        |          |         |
| MG_273 |          |           |          |             |           |          |        |          |         |
| MG_274 |          |           |          |             |           |          |        |          |         |
| MG_275 |          |           |          |             |           |          |        |          |         |
| MG_276 |          |           |          |             |           |          |        |          |         |
| MG_277 |          |           |          |             |           |          |        |          |         |
| MG_278 |          |           |          |             |           |          |        |          |         |
| MG_279 |          |           |          |             |           |          |        |          |         |
| MG_280 |          |           |          |             |           |          |        |          |         |
| MG_281 |          |           |          |             |           |          |        |          |         |
| MG_282 |          |           |          |             |           |          |        |          |         |
| MG_283 |          |           |          |             |           |          |        |          |         |
| MG_284 |          |           |          |             |           |          |        |          |         |
| MG_285 |          |           |          |             |           |          |        |          |         |
| MG_286 |          |           |          |             |           |          |        |          |         |
| MG_287 |          |           |          |             |           |          |        |          |         |
| MG_288 |          |           |          |             |           |          |        |          |         |
| MG_289 |          |           |          |             |           |          |        |          |         |
| MG_290 |          |           |          |             |           |          |        |          |         |
| MG_291 |          |           |          |             |           |          |        |          |         |
| MG_505 |          |           |          |             |           |          |        |          |         |
| MG_292 |          |           |          |             |           |          |        |          |         |
| MG_293 |          |           |          |             |           |          |        |          |         |
| MG_294 |          |           |          |             |           |          |        |          |         |
| MG_295 |          |           |          |             |           |          |        |          |         |
| MG_296 |          |           |          |             |           |          |        |          |         |
| MG_297 |          |           |          |             |           |          |        |          |         |
| MG_298 |          |           |          |             |           |          |        |          |         |
| MG_299 |          |           |          |             |           |          |        |          |         |
| MG_300 |          |           |          |             |           |          |        |          |         |
| MG_301 |          |           |          |             |           |          |        |          |         |
| MG_302 |          |           |          |             |           |          |        |          |         |
| MG_303 |          |           |          |             |           |          |        |          |         |
| MG_304 |          |           |          |             |           |          |        |          |         |
| MG_305 |          |           |          |             |           |          |        |          |         |

|        | Bethesda | Rockville | Fujisawa | Rockville 2 | Nashville | Stanford | Guelph | Valencia | Agreed* |
|--------|----------|-----------|----------|-------------|-----------|----------|--------|----------|---------|
| MG_306 |          |           |          |             |           |          |        |          |         |
| MG_307 |          |           |          |             |           |          |        |          |         |
| MG_308 |          |           |          |             |           |          |        |          |         |
| MG_309 |          |           |          |             |           |          |        |          |         |
| MG_310 |          |           |          |             |           |          |        |          |         |
| MG_311 |          |           |          |             |           |          |        |          |         |
| MG_312 |          |           |          |             |           |          |        |          |         |
| MG_313 |          |           |          |             |           |          |        |          |         |
| MG_314 |          |           |          |             |           |          |        |          |         |
| MG_315 |          |           |          |             |           |          |        |          |         |
| MG_316 |          |           |          |             |           |          |        |          |         |
| MG_317 |          |           |          |             |           |          |        |          |         |
| MG_318 |          |           |          |             |           |          |        |          |         |
| MG_319 |          |           |          |             |           |          |        |          |         |
| MG_320 |          |           |          |             |           |          |        |          |         |
| MG_321 |          |           |          |             |           |          |        |          |         |
| MG_322 |          |           |          |             |           |          |        |          |         |
| MG_323 |          |           |          |             |           |          |        |          |         |
| MG_515 |          |           |          |             |           |          |        |          |         |
| MG_324 |          |           |          |             |           |          |        |          |         |
| MG_325 |          |           |          |             |           |          |        |          |         |
| MG_326 |          |           |          |             |           |          |        |          |         |
| MG_327 |          |           |          |             |           |          |        |          |         |
| MG_328 |          |           |          |             |           |          |        |          |         |
| MG_329 |          |           |          |             |           |          |        |          |         |
| MG_330 |          |           |          |             |           |          |        |          |         |
| MG_331 |          |           |          |             |           |          |        |          |         |
| MG_332 |          |           |          |             |           |          |        |          |         |
| MG_333 |          |           |          |             |           |          |        |          |         |
| MG_334 |          |           |          |             |           |          |        |          |         |
| MG_335 |          |           |          |             |           |          |        |          |         |
| MG_516 |          |           |          |             |           |          |        |          |         |
| MG_517 |          |           |          |             |           |          |        |          |         |
| MG_336 |          |           |          |             |           |          |        |          |         |
| MG_337 |          |           |          |             |           |          |        |          |         |
| MG_338 |          |           |          |             |           |          |        |          |         |
| MG_339 |          |           |          |             |           |          |        |          |         |
| MG_340 |          |           |          |             |           |          |        |          |         |
| MG_341 |          |           |          |             |           |          |        |          |         |
| MG_342 |          |           |          |             |           |          |        |          |         |
| MG_343 |          |           |          |             |           |          |        |          |         |
| MG_344 |          |           |          |             |           |          |        |          |         |
| MG_345 |          |           |          |             |           |          |        |          |         |
| MG_346 |          |           |          |             |           |          |        |          |         |
| MG_347 |          |           |          |             |           |          |        |          |         |

|        | Bethesda | Rockville | Fujisawa | Rockville 2 | Nashville | Stanford | Guelph | Valencia | Agreed* |
|--------|----------|-----------|----------|-------------|-----------|----------|--------|----------|---------|
| MG_348 |          |           |          |             |           |          |        |          |         |
| MG_349 |          |           |          |             |           |          |        |          |         |
| MG_350 |          |           |          |             |           |          |        |          |         |
| MG_521 |          |           |          |             |           |          |        |          |         |
| MG_351 |          |           |          |             |           |          |        |          |         |
| MG_352 |          |           |          |             |           |          |        |          |         |
| MG_353 |          |           |          |             |           |          |        |          |         |
| MG_354 |          |           |          |             |           |          |        |          |         |
| MG_355 |          |           |          |             |           |          |        |          |         |
| MG_356 |          |           |          |             |           |          |        |          |         |
| MG_357 |          |           |          |             |           |          |        |          |         |
| MG_358 |          |           |          |             |           |          |        |          |         |
| MG_359 |          |           |          |             |           |          |        |          |         |
| MG_360 |          |           |          |             |           |          |        |          |         |
| MG_361 |          |           |          |             |           |          |        |          |         |
| MG_362 |          |           |          |             |           |          |        |          |         |
| MG_363 |          |           |          |             |           |          |        |          |         |
| MG_522 |          |           |          |             |           |          |        |          |         |
| MG_364 |          |           |          |             |           |          |        |          |         |
| MG_365 |          |           |          |             |           |          |        |          |         |
| MG_366 |          |           |          |             |           |          |        |          |         |
| MG_367 |          |           |          |             |           |          |        |          |         |
| MG_368 |          |           |          |             |           |          |        |          |         |
| MG_369 |          |           |          |             |           |          |        |          |         |
| MG_370 |          |           |          |             |           |          |        |          |         |
| MG_371 |          |           |          |             |           |          |        |          |         |
| MG_372 |          |           |          |             |           |          |        |          |         |
| MG_373 |          |           |          |             |           |          |        |          |         |
| MG_374 |          |           |          |             |           |          |        |          |         |
| MG_375 |          |           |          |             |           |          |        |          |         |
| MG_376 |          |           |          |             |           |          |        |          |         |
| MG_377 |          |           |          |             |           |          |        |          |         |
| MG_378 |          |           |          |             |           |          |        |          |         |
| MG_379 |          |           |          |             |           |          |        |          |         |
| MG_380 |          |           |          |             |           |          |        |          |         |
| MG_381 |          |           |          |             |           |          |        |          |         |
| MG_382 |          |           |          |             |           |          |        |          |         |
| MG_383 |          |           |          |             |           |          |        |          |         |
| MG_384 |          |           |          |             |           |          |        |          |         |
| MG_524 |          |           |          |             |           |          |        |          |         |
| MG_385 |          |           |          |             |           |          |        |          |         |
| MG_386 |          |           |          |             |           |          |        |          |         |
| MG_387 |          |           |          |             |           |          |        |          |         |
| MG_388 |          |           |          |             |           |          |        |          |         |
| MG_389 |          |           |          |             |           |          |        |          |         |





|        | Bethesda | Rockville | Fujisawa | Rockville 2 | Nashville | Stanford | Guelph | Valencia | Agreed* |
|--------|----------|-----------|----------|-------------|-----------|----------|--------|----------|---------|
| MG_439 |          |           |          |             |           |          |        |          |         |
| MG_440 |          |           |          |             |           |          |        |          |         |
| MG_441 |          |           |          |             |           |          |        |          |         |
| MG_442 |          |           |          |             |           |          |        |          |         |
| MG_443 |          |           |          |             |           |          |        |          |         |
| MG_444 |          |           |          |             |           |          |        |          |         |
| MG_445 |          |           |          |             |           |          |        |          |         |
| MG_446 |          |           |          |             |           |          |        |          |         |
| MG_447 |          |           |          |             |           |          |        |          |         |
| MG_448 |          |           |          |             |           |          |        |          |         |
| MG_449 |          |           |          |             |           |          |        |          |         |
| MG_450 |          |           |          |             |           |          |        |          |         |
| MG_451 |          |           |          |             |           |          |        |          |         |
| MG_452 |          |           |          |             |           |          |        |          |         |
| MG_453 |          |           |          |             |           |          |        |          |         |
| MG_454 |          |           |          |             |           |          |        |          |         |
| MG_455 |          |           |          |             |           |          |        |          |         |
| MG_456 |          |           |          |             |           |          |        |          |         |
| MG_457 |          |           |          |             |           |          |        |          |         |
| MG_458 |          |           |          |             |           |          |        |          |         |
| MG_459 |          |           |          |             |           |          |        |          |         |
| MG_460 |          |           |          |             |           |          |        |          |         |
| MG_461 |          |           |          |             |           |          |        |          |         |
| MG_462 |          |           |          |             |           |          |        |          |         |
| MG_463 |          |           |          |             |           |          |        |          |         |
| MG_464 |          |           |          |             |           |          |        |          |         |
| MG_465 |          |           |          |             |           |          |        |          |         |
| MG_466 |          |           |          |             |           |          |        |          |         |
| MG_467 |          |           |          |             |           |          |        |          |         |
| MG_468 |          |           |          |             |           |          |        |          |         |
| MG_526 |          |           |          |             |           |          |        |          |         |
| MG_469 |          |           |          |             |           |          |        |          |         |
| MG_470 |          |           |          |             |           |          |        |          |         |

**Table 3.** Comparing the gene content of the minimal gene sets. Light grey genes are unmodelled in the *M.genitalium* whole-cell model. Dark grey genes cause the simulation to crash (using Matlab R2013B on University of Bristol BlueGem's supercomputer). | = gene included in the minimal gene set. Agreed\* = genes that the minimal gene sets agree upon, but excluding the protocell designed sets.

|        | Bethesda | Rockville | Fujisawa | Rockville 2 | Nashville | Stanford | Guelph | Valencia | Agreed |
|--------|----------|-----------|----------|-------------|-----------|----------|--------|----------|--------|
| MG_001 |          |           | x        |             | x         |          |        |          |        |
| MG_002 |          | x         |          | x           |           |          |        |          |        |
| MG_003 |          |           | x        |             | x         |          |        |          |        |
| MG_004 |          |           | x        |             | x         |          |        |          |        |
| MG_005 |          |           |          |             |           |          |        |          |        |
| MG_006 |          |           | x        |             | x         |          | x      |          |        |
| MG_007 | x        |           | x        |             | x         |          | x      |          |        |
| MG_008 |          |           | x        |             | x         |          |        |          |        |
| MG_009 |          | x         | x        | x           | x         | x        | x      | x        |        |
| MG_010 |          | x         |          | x           |           |          |        |          |        |
| MG_011 |          | x         |          | x           |           |          |        |          |        |
| MG_012 |          |           | x        | x           | x         |          | x      | x        |        |
| MG_013 |          |           | x        |             | x         |          | x      | x        |        |
| MG_014 | x        | x         | x        |             | x         | x        | x      | x        |        |
| MG_015 |          |           | x        |             | x         | x        | x      | x        |        |
| MG_018 |          | x         |          | x           |           |          |        |          |        |
| MG_019 |          |           | x        |             | x         |          |        |          |        |
| MG_020 | x        |           | x        |             | x         |          | x      | x        |        |
| MG_021 |          |           |          |             |           |          |        |          |        |
| MG_022 | x        |           | x        |             | x         |          | x      | x        |        |
| MG_023 |          |           |          |             | x         |          | x      |          |        |
| MG_024 |          |           |          | x           |           |          |        |          |        |
| MG_025 |          | x         |          |             |           |          |        |          |        |
| MG_026 |          |           | x        |             |           |          | x      |          |        |
| MG_027 | x        |           | x        |             | x         | x        | x      | x        |        |
| MG_028 |          |           |          |             |           |          |        |          |        |
| MG_029 | x        | x         | x        |             | x         | x        | x      | x        |        |
| MG_030 |          |           | x        |             | x         | x        | x      |          |        |
| MG_031 | x        |           | x        |             | x         |          | x      |          |        |
| MG_032 |          | x         |          | x           |           |          |        |          |        |
| MG_033 |          | x         |          | x           | x         | x        | x      | x        |        |
| MG_034 | x        |           | x        |             | x         |          | x      | x        |        |
| MG_035 |          |           |          |             |           |          |        |          |        |
| MG_036 |          |           |          |             |           |          |        |          |        |
| MG_037 | x        |           | x        |             | x         |          | x      | x        |        |
| MG_038 |          |           |          |             | x         |          | x      | x        |        |
| MG_039 | x        |           | x        | x           | x         | x        | x      | x        |        |
| MG_040 | x        |           | x        | x           | x         | x        | x      | x        |        |
| MG_041 | x        |           |          |             | x         |          | x      |          |        |
| MG_042 |          |           | x        |             | x         |          | x      | x        |        |
| MG_043 |          |           | x        |             | x         |          | x      | x        |        |
| MG_044 |          |           | x        |             | x         |          | x      | x        |        |
| MG_045 |          |           | x        |             | x         |          | x      | x        |        |
| MG_046 | x        |           | x        |             | x         |          |        |          |        |
| MG_047 |          |           | x        |             | x         |          |        |          |        |

|        | Bethesda | Rockville | Fujisawa | Rockville 2 | Nashville | Stanford | Guelph | Valencia | Agreed |
|--------|----------|-----------|----------|-------------|-----------|----------|--------|----------|--------|
| MG_048 |          |           | x        |             | x         |          |        |          |        |
| MG_049 |          | x         | x        |             | x         |          | x      | x        |        |
| MG_050 |          |           | x        |             | x         | x        | x      | x        |        |
| MG_051 | x        | x         | x        | x           | x         |          | x      | x        |        |
| MG_052 |          | x         | x        |             | x         | x        | x      | x        |        |
| MG_053 |          |           | x        |             | x         |          | x      | x        |        |
| MG_054 |          |           |          |             |           |          |        |          |        |
| MG_055 | x        |           | x        |             | x         | x        | x      |          |        |
| MG_473 | x        |           | x        |             | x         |          | x      | x        |        |
| MG_474 |          |           |          |             |           |          |        |          |        |
| MG_056 |          |           |          | x           |           |          |        |          |        |
| MG_057 |          |           |          |             |           |          |        |          |        |
| MG_058 |          |           | x        |             | x         |          |        |          |        |
| MG_059 |          |           | x        |             | x         | x        |        |          |        |
| MG_060 |          |           |          |             |           |          |        |          |        |
| MG_061 | x        |           | x        | x           | x         | x        | x      | x        |        |
| MG_062 | x        | x         | x        | x           | x         | x        | x      | x        | x      |
| MG_063 |          |           | x        | x           | x         | x        | x      | x        |        |
| MG_064 | x        |           | x        |             | x         | x        | x      | x        |        |
| MG_065 |          |           | x        |             | x         | x        | x      | x        |        |
| MG_066 |          |           | x        | x           | x         |          |        |          |        |
| MG_067 |          | x         |          | x           |           |          |        |          |        |
| MG_068 |          |           |          |             |           |          |        |          |        |
| MG_069 | x        |           |          |             | x         |          | x      |          |        |
| MG_070 |          |           |          |             |           |          |        |          |        |
| MG_071 |          |           | x        |             | x         |          | x      | x        |        |
| MG_072 |          |           | x        |             | x         |          |        |          |        |
| MG_073 |          |           | x        |             | x         | x        | x      | x        |        |
| MG_074 |          |           |          |             |           |          |        |          |        |
| MG_075 | x        |           | x        |             | x         | x        | x      | x        |        |
| MG_076 |          |           |          |             |           |          |        |          |        |
| MG_077 |          |           | x        |             | x         |          | x      | x        |        |
| MG_078 |          |           | x        |             | x         |          | x      | x        |        |
| MG_079 |          |           | x        |             | x         |          | x      | x        |        |
| MG_080 |          |           | x        |             | x         |          | x      | x        |        |
| MG_081 |          |           |          |             |           |          |        |          |        |
| MG_082 |          |           |          |             |           |          |        |          |        |
| MG_083 |          |           | x        |             | x         | x        |        |          |        |
| MG_084 | x        |           | x        |             | x         |          |        |          |        |
| MG_085 | x        | x         | x        |             | x         | x        | x      | x        |        |
| MG_086 |          |           | x        |             | x         | x        | x      | x        |        |
| MG_087 |          |           |          |             |           |          |        |          |        |
| MG_088 |          |           |          |             |           |          |        |          |        |
| MG_089 |          |           |          |             |           |          |        |          |        |
| MG_090 |          |           |          |             |           |          | x      |          |        |

|        | Bethesda | Rockville | Fujisawa | Rockville 2 | Nashville | Stanford | Guelph | Valencia | Agreed |
|--------|----------|-----------|----------|-------------|-----------|----------|--------|----------|--------|
| MG_091 |          |           | x        |             | x         |          | x      | x        |        |
| MG_092 |          |           |          |             |           |          |        |          |        |
| MG_093 |          |           |          |             |           |          | x      |          |        |
| MG_094 |          |           | x        |             | x         |          |        |          |        |
| MG_095 |          |           |          |             |           |          |        |          |        |
| MG_096 |          | x         |          | x           |           |          |        |          |        |
| MG_097 |          |           | x        |             | x         | x        | x      |          |        |
| MG_098 | x        |           | x        |             | x         |          | x      | x        |        |
| MG_099 | x        |           | x        |             |           |          | x      | x        |        |
| MG_100 | x        |           | x        |             |           |          | x      | x        |        |
| MG_101 | x        |           | x        |             | x         | x        | x      | x        |        |
| MG_102 |          |           | x        |             | x         |          |        |          |        |
| MG_103 |          | x         |          | x           |           |          |        |          |        |
| MG_476 | x        |           | x        |             | x         |          | x      | x        |        |
| MG_104 |          |           | x        |             | x         |          | x      | x        |        |
| MG_105 | x        |           | x        |             | x         | x        | x      | x        |        |
| MG_106 |          |           | x        |             | x         |          | x      | x        |        |
| MG_107 |          |           | x        |             | x         |          |        |          |        |
| MG_108 |          |           |          |             |           |          |        |          |        |
| MG_109 | x        |           | x        |             | x         |          | x      | x        |        |
| MG_110 | x        | x         | x        | x           | x         |          | x      | x        |        |
| MG_111 |          |           |          |             | x         |          |        |          |        |
| MG_112 |          |           | x        | x           | x         |          |        |          |        |
| MG_113 |          |           |          |             |           |          |        |          |        |
| MG_114 |          |           |          | x           | x         |          | x      | x        |        |
| MG_115 |          |           |          | x           |           |          |        |          |        |
| MG_116 |          |           |          | x           |           |          |        |          |        |
| MG_117 |          |           |          |             |           |          |        |          |        |
| MG_118 |          |           | x        |             | x         |          | x      | x        |        |
| MG_119 |          |           | x        |             | x         | x        | x      | x        |        |
| MG_120 |          |           | x        |             | x         | x        | x      | x        |        |
| MG_121 | x        |           | x        | x           | x         | x        | x      | x        |        |
| MG_122 |          |           | x        |             | x         |          | x      | x        |        |
| MG_123 | x        |           | x        |             | x         | x        | x      | x        |        |
| MG_124 |          |           | x        |             | x         |          |        |          |        |
| MG_125 |          |           |          |             |           |          |        |          |        |
| MG_126 |          |           |          |             |           |          |        |          |        |
| MG_127 |          |           | x        |             | x         | x        | x      | x        |        |
| MG_128 | x        |           | x        |             | x         |          | x      | x        |        |
| MG_129 |          |           |          |             |           |          |        |          |        |
| MG_130 | x        | x         | x        |             | x         | x        | x      | x        |        |
| MG_131 |          | x         |          | x           |           |          |        |          |        |
| MG_132 | x        | x         | x        |             | x         | x        | x      | x        |        |
| MG_133 |          |           |          |             |           |          |        |          |        |
| MG_134 |          |           |          | x           |           |          |        |          |        |

|        | Bethesda | Rockville | Fujisawa | Rockville 2 | Nashville | Stanford | Guelph | Valencia | Agreed |
|--------|----------|-----------|----------|-------------|-----------|----------|--------|----------|--------|
| MG_135 |          |           |          |             |           |          |        |          |        |
| MG_136 |          |           |          |             |           |          |        |          |        |
| MG_137 | x        |           | x        |             | x         |          | x      | x        |        |
| MG_138 |          |           |          | x           |           |          |        |          |        |
| MG_139 | x        |           | x        |             | x         |          | x      | x        |        |
| MG_140 |          | x         |          | x           |           |          |        |          |        |
| MG_141 |          |           | x        |             | x         |          |        |          |        |
| MG_477 |          | x         |          |             |           |          |        |          |        |
| MG_142 |          |           |          |             |           |          |        |          |        |
| MG_143 |          |           | x        |             | x         |          | x      |          |        |
| MG_144 |          |           |          |             |           |          |        |          |        |
| MG_145 |          |           | x        |             | x         |          |        |          |        |
| MG_146 |          |           |          |             |           |          |        |          |        |
| MG_147 |          |           |          |             |           |          |        |          |        |
| MG_148 |          |           |          |             |           |          |        |          |        |
| MG_149 | x        | x         | x        | x           | x         | x        | x      | x        | x      |
| MG_478 |          |           |          | x           |           |          |        |          |        |
| MG_150 |          |           |          |             |           |          |        |          |        |
| MG_151 |          |           |          |             |           |          |        |          |        |
| MG_152 |          |           |          |             |           |          |        |          |        |
| MG_153 |          |           |          |             |           |          | x      |          |        |
| MG_154 |          |           |          |             |           |          |        |          |        |
| MG_155 |          |           |          |             |           |          |        |          |        |
| MG_156 |          |           |          |             |           |          |        |          |        |
| MG_157 |          |           |          |             |           |          |        |          |        |
| MG_158 |          |           |          |             |           |          |        |          |        |
| MG_159 |          |           |          |             |           |          | x      |          |        |
| MG_160 |          |           |          |             |           |          |        |          |        |
| MG_161 |          |           |          |             |           |          |        |          |        |
| MG_162 |          |           |          |             |           |          |        |          |        |
| MG_163 |          |           |          |             |           |          |        |          |        |
| MG_164 |          |           |          |             |           |          | x      |          |        |
| MG_165 |          |           |          |             |           |          |        |          |        |
| MG_166 |          |           |          |             |           |          |        |          |        |
| MG_167 |          |           |          |             |           |          |        |          |        |
| MG_168 |          |           |          |             |           |          |        |          |        |
| MG_169 |          |           | x        |             |           |          | x      |          |        |
| MG_170 |          |           | x        |             | x         |          |        |          |        |
| MG_171 |          |           | x        |             |           |          |        |          |        |
| MG_172 |          |           | x        |             | x         |          |        |          |        |
| MG_173 |          |           |          |             |           |          |        |          |        |
| MG_174 |          |           |          |             |           |          | x      |          |        |
| MG_175 |          |           |          |             |           |          |        |          |        |
| MG_176 |          |           |          |             |           |          |        |          |        |
| MG_177 |          |           |          |             | x         |          |        |          |        |



|        | Bethesda | Rockville | Fujisawa | Rockville 2 | Nashville | Stanford | Guelph | Valencia | Agreed |
|--------|----------|-----------|----------|-------------|-----------|----------|--------|----------|--------|
| MG_220 |          |           |          | x           |           |          |        |          |        |
| MG_221 |          |           | x        |             | x         |          | x      | x        |        |
| MG_222 |          |           |          |             |           |          |        |          |        |
| MG_223 |          |           |          |             |           |          |        |          |        |
| MG_224 |          |           | x        |             | x         |          |        |          |        |
| MG_225 | x        |           | x        |             | x         | x        | x      | x        |        |
| MG_226 | x        | x         | x        | x           | x         | x        | x      | x        | x      |
| MG_227 |          |           | x        | x           | x         | x        | x      |          |        |
| MG_228 |          |           | x        |             | x         |          | x      |          |        |
| MG_229 |          |           | x        |             | x         |          | x      |          |        |
| MG_230 | x        |           | x        |             | x         |          | x      | x        |        |
| MG_231 |          |           | x        |             | x         |          |        |          |        |
| MG_232 |          |           |          |             |           |          | x      |          |        |
| MG_233 |          |           |          |             |           |          |        |          |        |
| MG_234 |          |           |          |             |           |          |        |          |        |
| MG_235 | x        |           | x        |             | x         | x        | x      |          |        |
| MG_236 | x        |           | x        |             | x         | x        | x      | x        |        |
| MG_237 |          | x         |          | x           |           |          |        |          |        |
| MG_238 |          |           | x        | x           | x         |          | x      | x        |        |
| MG_239 |          |           | x        |             | x         |          | x      | x        |        |
| MG_240 | x        |           | x        |             | x         | x        | x      | x        |        |
| MG_241 |          |           |          |             |           |          |        |          |        |
| MG_242 |          |           |          |             |           |          |        |          |        |
| MG_243 |          |           |          |             |           |          |        |          |        |
| MG_244 |          |           | x        | x           | x         | x        | x      | x        |        |
| MG_245 |          |           | x        |             | x         |          | x      | x        |        |
| MG_246 |          |           |          |             |           |          |        |          |        |
| MG_247 |          |           |          |             |           |          |        |          |        |
| MG_248 |          |           |          | x           |           |          |        |          |        |
| MG_249 |          |           |          |             | x         |          |        |          |        |
| MG_250 |          |           | x        |             | x         | x        |        |          |        |
| MG_251 |          |           |          |             |           |          | x      |          |        |
| MG_252 |          |           | x        | x           | x         | x        | x      | x        |        |
| MG_253 |          |           |          |             |           |          |        |          |        |
| MG_254 |          |           | x        |             | x         |          |        |          |        |
| MG_255 |          | x         |          | x           |           |          |        |          |        |
| MG_494 |          | x         |          | x           |           |          |        |          |        |
| MG_256 |          | x         |          | x           |           |          |        |          |        |
| MG_257 |          |           |          |             |           |          |        |          |        |
| MG_258 |          |           | x        |             |           |          |        |          |        |
| MG_259 |          |           | x        |             |           | x        | x      |          |        |
| MG_260 |          |           |          | x           |           |          |        |          |        |
| MG_261 |          |           | x        |             | x         |          |        |          |        |
| MG_262 |          |           | x        |             | x         | x        |        |          |        |
| MG_498 |          |           | x        | x           | x         | x        | x      | x        |        |











|        | Bethesda | Rockville | Fujisawa | Rockville 2 | Nashville | Stanford | Guelph | Valencia | Agreed |
|--------|----------|-----------|----------|-------------|-----------|----------|--------|----------|--------|
| MG_440 |          | x         |          |             |           |          |        |          |        |
| MG_441 |          |           |          |             |           |          |        |          |        |
| MG_442 | x        | x         | x        |             | x         |          | x      | x        |        |
| MG_443 |          |           |          |             |           |          |        |          |        |
| MG_444 |          |           |          |             |           |          |        |          |        |
| MG_445 |          |           | x        |             |           |          |        | x        |        |
| MG_446 |          |           |          |             |           |          |        |          |        |
| MG_447 | x        |           | x        |             | x         | x        | x      | x        |        |
| MG_448 |          |           | x        |             | x         | x        | x      | x        |        |
| MG_449 |          | x         |          | x           |           |          |        |          |        |
| MG_450 |          |           |          |             |           |          |        |          |        |
| MG_451 |          |           |          |             |           |          |        |          |        |
| MG_452 |          | x         |          | x           |           |          |        |          |        |
| MG_453 |          |           | x        |             | x         |          | x      | x        |        |
| MG_454 | x        |           | x        | x           | x         | x        | x      | x        |        |
| MG_455 |          |           |          |             |           |          |        |          |        |
| MG_456 |          |           |          | x           |           |          |        |          |        |
| MG_457 |          |           | x        |             | x         | x        |        |          |        |
| MG_458 |          |           | x        |             | x         |          | x      |          |        |
| MG_459 |          |           |          |             |           |          |        |          |        |
| MG_460 | x        |           |          | x           | x         | x        | x      | x        |        |
| MG_461 |          |           |          |             |           |          |        |          |        |
| MG_462 |          |           |          |             |           |          |        |          |        |
| MG_463 |          |           | x        | x           | x         | x        |        |          |        |
| MG_464 | x        |           | x        |             | x         |          | x      |          |        |
| MG_465 |          |           | x        |             |           |          | x      |          |        |
| MG_466 |          |           |          |             |           |          | x      |          |        |
| MG_467 | x        | x         | x        |             | x         | x        | x      | x        |        |
| MG_468 | x        | x         | x        |             | x         | x        | x      | x        |        |
| MG_526 | x        |           | x        |             | x         | x        | x      | x        |        |
| MG_469 |          |           | x        |             | x         |          |        | x        |        |
| MG_470 | x        | x         | x        |             | x         | x        | x      | x        |        |

**Table 4.** Comparing the gene deletions of the minimal gene sets. Light grey genes are unmodelled in the *M.genitalium* whole-cell model. Dark grey genes cause the simulation to crash (using Matlab R2013B on University of Bristol BlueGem's supercomputer). x = a gene deletion required to produce the minimal gene set in the *M.genitalium* whole-cell model.

## Analysing the Minimal Gene Sets

A comparison of six of the minimal gene sets (the protocell minimal gene sets (Nashville, Fujisawa) were excluded due to their comparatively massively reduced size) showed that they had 96 genes in common (Table 3, Agreed\* Column). Of these 96 genes, 87 were classified as essential by single gene deletion, eight were non-essential, and one gene was unmodelled (Supplementary Information 1). The 87 essential genes underline the cellular functional groups that the six minimal gene sets agree are essential: DNA (repair, supercoiling, chromosome replication, synthesis and modification of nucleotides, sigma factors, ligation, transcription termination, and DNA polymerase); RNA (ribosome proteins, initiation factors for translation, tRNA modification, ribonucleases, and RNA polymerase); and cellular processes (protein folding and modification, shuttling of proteins, protein membrane transport, production and recycling of metabolic substrates and intermediates, redox signalling, oxidation stress response, and the pyruvate dehydrogenase complex). Of the eight non-essential genes, four (MG\_048, MG\_072, MG\_170, MG\_297) are associated with the SecYEG complex<sup>2828</sup> (which moves protein across or inserts them into the cell membrane), while MG\_172 removes the start codon that initiates protein synthesis from synthesised nascent proteins, MG\_305 and MG\_392 assist in late protein folding, and MG\_425 processes ribosomal RNA precursors. Although these eight genes are singly non-essential, they all play a part in essential functions within the cell, hence their inclusion in minimal gene sets.

A comparison of the genes deleted from the *M.genitalium* genome by all the eight minimal gene sets showed that they shared 14 gene deletions in common (Table 4, Agreed Column). The function of these genes includes: fructose import, activation of host immune response, chromosomal partition, amino acid transport, antibody binding, phosphonate transport, external DNA uptake, DNA repair, rRNA modification, membrane breakdown, toxin transport, quorum sensing, and a restriction enzyme. These have all been previously classified as non-essential for cell survival by single gene deletion *in-silico*<sup>88</sup> and *in-vivo*<sup>66</sup>, hence their exclusion from the minimal gene sets. We placed these 14 common genes in an 'agreed set' which was simulated in addition to the minimal gene sets from the literature.

## Testing the Minimal Gene Sets

We simulated each minimal gene set in the *M.genitalium* whole-cell model and found that every set, including the agreed set, produced a non-dividing *in-silico* cell. Each minimal gene set was simulated ten times per experiment, and each experiment was repeated three times (Table 5). These cells showed faults in the metabolism, resulting in no DNA replication, RNA production, protein production, growth, or successful cell division.

An initial analysis found that every one of the sets from the literature deleted essential genes (genes that when removed stop the cell successfully dividing). The number of essential genes deleted varied depending on the set: Nashville deleted 121, Fujisawa deleted 112, Guelph deleted 107, Valencia deleted 69, Bethesda deleted 34, Rockville and Rockville 2 both deleted 9, and Stanford deleted 3. This follows a similar pattern to *in-silico* genome size, protocell minimal gene sets removed the most essential genes and comparative genomics removed greater numbers of essential genes the higher the number of genomes compared. However, single gene deletion minimal gene sets also removed essential genes. This is likely due to transposon mutagenesis issues at the time of the minimal gene set design. Rockville labelled six genes as non-essential and so were excluded from the minimal gene set in 1999, but were later found to be essential by Rockville 2 in 2006. Even as recently as 2016, Hutchison *et al.*<sup>2727</sup> had to make major improvements to their transposon mutagenesis protocol while producing *JCVI-Syn3.0*, due to incorrect identification of essentiality. Stanford removed MG\_203, MG\_250, and MG\_470, likely due to averaging multiple simulation's data together before computationally assessing, three genes which our simulations found to be essential (Supplementary Information 1).

| Repetitions | 1           | 2           | 3           |
|-------------|-------------|-------------|-------------|
| Bethesda    | No Division | No Division | No Division |
| Bethesda    | No Division | No Division | No Division |
| Bethesda    | No Division | No Division | No Division |
| Bethesda    | No Division | No Division | No Division |
| Bethesda    | No Division | No Division | No Division |
| Bethesda    | No Division | No Division | No Division |
| Bethesda    | No Division | No Division | No Division |
| Bethesda    | No Division | No Division | No Division |
| Bethesda    | No Division | No Division | No Division |
| Bethesda    | No Division | No Division | No Division |
| Bethesda    | No Division | No Division | No Division |
| Rockville   | No Division | No Division | No Division |
| Rockville   | No Division | No Division | No Division |
| Rockville   | No Division | No Division | No Division |
| Rockville   | -           | No Division | No Division |
| Rockville   | No Division | No Division | No Division |
| Rockville   | -           | No Division | No Division |
| Rockville   | No Division | No Division | No Division |
| Rockville   | No Division | No Division | No Division |
| Rockville   | No Division | No Division | No Division |
| Rockville   | No Division | No Division | No Division |
| Rockville   | No Division | No Division | No Division |
| Fujisawa    | -           | No Division | -           |
| Fujisawa    | -           | -           | -           |
| Fujisawa    | -           | -           | No Division |
| Fujisawa    | No Division | -           | -           |
| Fujisawa    | -           | -           | -           |
| Fujisawa    | No Division | No Division | -           |
| Fujisawa    | No Division | -           | -           |
| Fujisawa    | -           | -           | -           |
| Fujisawa    | -           | No Division | -           |
| Fujisawa    | -           | -           | -           |
| Rockville 2 | No Division | No Division | No Division |
| Rockville 2 | No Division | No Division | No Division |
| Rockville 2 | No Division | No Division | No Division |
| Rockville 2 | No Division | No Division | No Division |
| Rockville 2 | No Division | No Division | No Division |
| Rockville 2 | No Division | No Division | No Division |
| Rockville 2 | No Division | No Division | No Division |
| Rockville 2 | No Division | No Division | No Division |
| Rockville 2 | No Division | No Division | No Division |
| Rockville 2 | No Division | No Division | No Division |
| Rockville 2 | No Division | No Division | No Division |
| Nashville   | -           | No Division | -           |
| Nashville   | -           | No Division | -           |
| Nashville   | -           | -           | No Division |
| Nashville   | -           | -           | -           |
| Nashville   | -           | No Division | -           |





**Table 5.** Simulating the minimal gene sets as represented in the literature in the *M.genitalium* whole-cell model.

### **Repairing the Minimal Gene Sets**

We reintroduced the essential genes to the minimal gene sets, in an attempt to restore *in-silico* division. Based on previous research <sup>2929</sup>, we also reintroduced low essential genes (e.g. if the gene is dispensable in some contexts, i.e. redundant essential genes and gene complexes <sup>1919</sup>), knowing that they would impact the *in-silico* cell's ability to divide. Each “repaired” minimal gene set was simulated ten times per experiment, and each experiment was repeated three times (Table 6). By reintroducing these genes, specific to each set (Table 7), each set produced a dividing cell *in-silico* (Table 8), including the agreed set.





**Table 6.** Simulating the minimal gene sets with genes reintroduced to “repair” them in the *M.genitalium* whole-cell model. The reintroduced genes are listed in Table 7.

|        | Protocells |          | Comparative Genomics |          |          | Single Gene Knockouts |             |           |
|--------|------------|----------|----------------------|----------|----------|-----------------------|-------------|-----------|
|        | Nashville  | Fujisawa | Guelph               | Bethesda | Valencia | Stanford              | Rockville 2 | Rockville |
| MG_001 | r          | r        |                      |          |          |                       |             |           |
| MG_003 | r          | r        |                      |          |          |                       |             |           |
| MG_004 | r          | r        |                      |          |          |                       |             |           |
| MG_006 | r          | r        | r                    |          |          |                       |             |           |
| MG_007 | r          | r        | r                    | r        |          |                       |             |           |
| MG_008 | r          | r        |                      |          |          |                       |             |           |
| MG_013 | r          | r        | r                    |          | r        |                       |             |           |
| MG_019 | r          | r        |                      |          |          |                       |             |           |
| MG_022 | r          | r        | r                    | r        | r        |                       |             |           |
| MG_023 | r          |          | r                    |          |          |                       |             |           |
| MG_026 |            | r        | r                    |          |          |                       |             |           |
| MG_031 | r          | r        | r                    | r        |          |                       |             |           |
| MG_034 | r          | r        | r                    | r        | r        |                       |             |           |
| MG_037 | r          | r        | r                    | r        | r        |                       |             |           |
| MG_038 | r          |          | r                    |          | r        |                       |             |           |
| MG_039 | r          | r        | r                    | r        | r        | r                     | r           | r         |
| MG_041 | r          |          | r                    | r        |          |                       |             |           |
| MG_042 | r          | r        | r                    |          | r        |                       |             |           |
| MG_043 | r          | r        | r                    |          | r        |                       |             |           |
| MG_044 | r          | r        | r                    |          | r        |                       |             |           |
| MG_045 | r          | r        | r                    |          | r        |                       |             |           |
| MG_047 | r          | r        |                      |          |          |                       |             |           |
| MG_049 | r          | r        | r                    |          | r        |                       |             | r         |
| MG_051 | r          | r        | r                    | r        | r        |                       | r           | r         |
| MG_053 | r          | r        | r                    |          | r        |                       |             |           |
| MG_058 | r          | r        |                      |          |          |                       |             |           |
| MG_066 | r          | r        |                      |          |          |                       | r           |           |
| MG_069 | r          |          | r                    | r        |          |                       |             |           |
| MG_071 | r          | r        | r                    |          | r        |                       |             |           |
| MG_077 | r          | r        | r                    |          | r        |                       |             |           |
| MG_078 | r          | r        | r                    |          | r        |                       |             |           |
| MG_079 | r          | r        | r                    |          | r        |                       |             |           |
| MG_080 | r          | r        | r                    |          | r        |                       |             |           |
| MG_084 | r          | r        |                      | r        |          |                       |             |           |
| MG_090 |            |          | r                    |          |          |                       |             |           |
| MG_091 | r          | r        | r                    |          | r        |                       |             |           |
| MG_093 |            |          | r                    |          |          |                       |             |           |
| MG_094 | r          | r        |                      |          |          |                       |             |           |
| MG_098 | r          | r        | r                    | r        | r        |                       |             |           |

|        | Nashville | Fujisawa | Guelph | Bethesda | Valencia | Stanford | Rockville 2 | Rockville |
|--------|-----------|----------|--------|----------|----------|----------|-------------|-----------|
| MG_099 |           | r        | r      | r        | r        |          |             |           |
| MG_100 |           | r        | r      | r        | r        |          |             |           |
| MG_102 | r         | r        |        |          |          |          |             |           |
| MG_104 | r         | r        | r      |          | r        |          |             |           |
| MG_106 | r         | r        | r      |          | r        |          |             |           |
| MG_107 | r         | r        |        |          |          |          |             |           |
| MG_111 | r         |          |        |          |          |          |             |           |
| MG_112 | r         | r        |        |          |          |          | r           |           |
| MG_114 | r         |          | r      |          | r        |          | r           |           |
| MG_118 | r         | r        | r      |          | r        |          |             |           |
| MG_124 | r         | r        |        |          |          |          |             |           |
| MG_128 | r         | r        | r      | r        | r        |          |             |           |
| MG_137 | r         | r        | r      | r        | r        |          |             |           |
| MG_141 | r         | r        |        |          |          |          |             |           |
| MG_145 | r         | r        |        |          |          |          |             |           |
| MG_153 |           |          | r      |          |          |          |             |           |
| MG_159 |           |          | r      |          |          |          |             |           |
| MG_164 |           |          | r      |          |          |          |             |           |
| MG_169 |           | r        | r      |          |          |          |             |           |
| MG_171 |           | r        |        |          |          |          |             |           |
| MG_174 |           |          | r      |          |          |          |             |           |
| MG_177 | r         |          |        |          |          |          |             |           |
| MG_179 | r         | r        | r      | r        | r        |          |             |           |
| MG_180 | r         | r        | r      |          | r        |          |             |           |
| MG_181 | r         | r        | r      | r        | r        |          |             |           |
| MG_182 | r         | r        | r      |          | r        |          |             | r         |
| MG_195 |           | r        | r      |          |          |          |             |           |
| MG_201 | r         | r        | r      |          |          |          |             |           |
| MG_203 | r         | r        | r      |          | r        | r        |             |           |
| MG_204 | r         | r        | r      |          | r        |          |             |           |
| MG_212 | r         | r        | r      |          |          |          |             |           |
| MG_215 | r         |          | r      |          |          |          |             |           |
| MG_216 | r         |          | r      |          |          |          |             |           |
| MG_221 | r         | r        | r      |          | r        |          |             |           |
| MG_224 | r         | r        |        |          |          |          |             |           |
| MG_228 | r         | r        | r      |          |          |          |             |           |
| MG_229 | r         | r        | r      |          |          |          |             |           |
| MG_230 | r         | r        | r      | r        |          |          |             |           |
| MG_231 | r         | r        |        |          |          |          |             |           |
| MG_232 |           |          | r      |          |          |          |             |           |
| MG_238 | r         | r        | r      |          | r        |          | r           |           |
| MG_245 | r         | r        | r      |          | r        |          |             |           |
| MG_249 | r         |          |        |          |          |          |             |           |
| MG_250 | r         | r        |        |          |          | r        |             |           |
| MG_251 |           |          | r      |          |          |          |             |           |

|        | Nashville | Fujisawa | Guelph | Bethesda | Valencia | Stanford | Rockville 2 | Rockville |
|--------|-----------|----------|--------|----------|----------|----------|-------------|-----------|
| MG_254 | r         | r        |        |          |          |          |             |           |
| MG_258 |           | r        |        |          |          |          |             |           |
| MG_261 | r         | r        |        |          |          |          |             |           |
| MG_270 | r         | r        | r      |          | r        |          |             |           |
| MG_271 | r         | r        | r      |          | r        |          | r           |           |
| MG_272 | r         | r        | r      |          | r        |          |             |           |
| MG_273 | r         | r        | r      |          | r        |          |             |           |
| MG_274 | r         | r        | r      |          | r        |          |             |           |
| MG_275 | r         | r        | r      |          | r        |          |             |           |
| MG_276 | r         | r        | r      |          | r        |          |             |           |
| MG_278 | r         | r        | r      |          | r        |          |             |           |
| MG_282 | r         | r        |        |          |          |          |             |           |
| MG_283 |           |          | r      |          |          |          |             |           |
| MG_287 | r         | r        | r      |          | r        |          |             |           |
| MG_289 | r         | r        | r      |          | r        | r        | r           |           |
| MG_290 | r         | r        | r      |          | r        | r        | r           |           |
| MG_291 | r         | r        | r      |          | r        | r        | r           | r         |
| MG_295 | r         | r        |        |          |          |          |             | r         |
| MG_299 | r         | r        | r      |          | r        |          |             |           |
| MG_300 | r         |          |        |          |          |          |             |           |
| MG_301 | r         |          |        |          |          |          |             |           |
| MG_302 | r         | r        | r      | r        | r        |          |             |           |
| MG_303 | r         | r        | r      | r        | r        |          |             |           |
| MG_304 | r         | r        | r      | r        | r        |          |             |           |
| MG_305 | r         | r        |        |          |          |          |             |           |
| MG_311 |           |          |        | r        |          |          |             |           |
| MG_315 | r         | r        | r      | r        |          | r        | r           |           |
| MG_321 | r         | r        | r      | r        | r        |          |             |           |
| MG_322 | r         | r        | r      |          | r        |          |             |           |
| MG_323 | r         | r        | r      | r        | r        |          |             |           |
| MG_325 |           |          | r      |          |          |          |             |           |
| MG_330 | r         | r        | r      |          | r        |          |             |           |
| MG_340 | r         |          |        |          |          |          |             |           |
| MG_341 | r         |          |        |          |          |          |             |           |
| MG_342 | r         | r        | r      | r        | r        |          |             |           |
| MG_345 |           |          |        |          |          |          |             | r         |
| MG_347 | r         | r        | r      |          | r        |          |             |           |
| MG_351 |           |          | r      |          |          |          |             |           |
| MG_357 | r         | r        | r      |          | r        |          |             |           |
| MG_363 |           |          | r      |          |          |          |             |           |
| MG_365 |           |          | r      |          | r        |          |             |           |
| MG_367 | r         | r        |        |          |          |          | r           |           |
| MG_368 | r         | r        | r      | r        | r        |          |             |           |
| MG_372 | r         | r        | r      | r        | r        |          |             | r         |
| MG_375 |           |          | r      |          |          |          |             |           |

|        | Nashville | Fujisawa | Guelph | Bethesda | Valencia | Stanford | Rockville 2 | Rockville |
|--------|-----------|----------|--------|----------|----------|----------|-------------|-----------|
| MG_379 | r         | r        | r      |          |          |          |             |           |
| MG_382 | r         | r        | r      |          | r        |          |             |           |
| MG_383 | r         | r        | r      |          | r        |          |             |           |
| MG_384 | r         | r        |        |          |          |          |             |           |
| MG_387 | r         | r        | r      |          |          |          |             |           |
| MG_394 | r         | r        |        |          |          |          |             | r         |
| MG_396 | r         | r        | r      | r        |          |          |             |           |
| MG_407 | r         |          |        |          |          |          |             |           |
| MG_419 | r         | r        | r      | r        | r        |          |             |           |
| MG_424 | r         |          |        |          |          |          |             |           |
| MG_426 |           |          | r      |          |          |          |             | r         |
| MG_427 | r         | r        | r      |          | r        | r        |             |           |
| MG_429 | r         |          |        | r        |          |          |             |           |
| MG_430 | r         |          | r      |          |          |          |             |           |
| MG_431 | r         |          |        |          |          |          |             |           |
| MG_434 | r         | r        | r      |          | r        |          |             |           |
| MG_435 |           | r        |        |          |          |          |             |           |
| MG_437 | r         |          | r      |          |          |          | r           |           |
| MG_444 |           |          |        |          | r        |          |             |           |
| MG_445 |           | r        |        |          |          |          |             |           |
| MG_453 | r         | r        | r      |          | r        |          |             |           |
| MG_458 | r         | r        | r      |          |          |          |             |           |
| MG_465 |           | r        | r      |          |          |          |             |           |
| MG_466 |           |          | r      |          |          |          |             |           |
| MG_469 | r         | r        |        |          | r        |          |             |           |
| MG_470 | r         | r        | r      | r        | r        | r        |             | r         |
| MG_473 | r         | r        | r      | r        | r        |          |             |           |
| MG_481 | r         | r        | r      | r        | r        |          |             |           |
| MG_517 | r         | r        | r      | r        | r        |          |             |           |
| MG_522 |           |          | r      |          |          |          |             |           |

**Table 7.** Comparing the gene reintroductions made to make the minimal gene sets produce *in-silico* dividing cells. Light grey genes are low essential genes in the *M.genitalium* whole-cell model. r = a gene reintroduction.

|             | Design approach       | <i>In-silico</i> gene deletions (cell did not divide) | <i>In-silico</i> gene deletions (cell divided) | Genes reintroduced | Size of <i>in-silico</i> genome |
|-------------|-----------------------|-------------------------------------------------------|------------------------------------------------|--------------------|---------------------------------|
| Nashville   | Protocell             | 270                                                   | 142                                            | 128                | 217                             |
| Fujisawa    | Protocell             | 261                                                   | 141                                            | 120                | 218                             |
| Guelph      | Comparative Genomics  | 241                                                   | 129                                            | 112                | 230                             |
| Valencia    | Comparative Genomics  | 185                                                   | 110                                            | 75                 | 249                             |
| Stanford    | Single Gene Deletions | 117                                                   | 109                                            | 8                  | 250                             |
| Bethesda    | Comparative Genomics  | 118                                                   | 82                                             | 36                 | 277                             |
| Rockville 2 | Single Gene Deletions | 57                                                    | 45                                             | 12                 | 314                             |
| Rockville   | Single Gene Deletions | 53                                                    | 43                                             | 10                 | 316                             |

**Table 8.** Minimal gene sets that produce dividing *in-silico* cells. After the reintroduction of essential and low essential genes.

To repair the agreed set, one low essential gene had to be reintroduced (MG\_291), which is involved in phosphonate transport with two other genes (MG\_289, MG\_290). The agreed set also removed MG\_412, a gene that along with MG\_410 and MG\_411, is involved with phosphate transport. By disrupting both these processes, the agreed set produced an *in-silico* cell that did not have a source of phosphate. This relationship has been established previously<sup>2929</sup>. MG\_291 had to be reintroduced in every minimal gene set apart from Bethesda, which does not remove phosphate transport (MG\_410, MG\_411, MG\_412). MG\_289 and MG\_290 also had to be reintroduced in six of the minimal gene sets.

We identified 31 genes that were reintroduced into at least five of the minimal gene sets (Table 9). 26 were classified as essential and 5 as low essential (Supplementary Information 2). The cellular functional groups that the minimal gene sets needed reintroducing were: DNA (polymerase delta / gamma / tau subunits, introduction of thymidine into DNA, rescue of pyrimidine bases for nucleotide synthesis, chromosome segregation); RNA (polymerase subunit delta, tRNA modification, 50S and 30S ribosomal subunits); transporters (cobalt, phosphonate, potassium); production (NAD, flavin, NADP, fatty acid/phospholipids); and dehydrogenation (glycerol and alpha-keto acids).



|    |        |    |        |    |        |
|----|--------|----|--------|----|--------|
| 1  | MG_022 | 11 | MG_203 | 21 | MG_321 |
| 2  | MG_034 | 12 | MG_238 | 22 | MG_323 |
| 3  | MG_037 | 13 | MG_271 | 23 | MG_342 |
| 4  | MG_039 | 14 | MG_289 | 24 | MG_368 |
| 5  | MG_051 | 15 | MG_290 | 25 | MG_372 |
| 6  | MG_098 | 16 | MG_291 | 26 | MG_419 |
| 7  | MG_128 | 17 | MG_302 | 27 | MG_427 |
| 8  | MG_137 | 18 | MG_303 | 28 | MG_470 |
| 9  | MG_179 | 19 | MG_304 | 29 | MG_473 |
| 10 | MG_181 | 20 | MG_315 | 30 | MG_481 |
|    |        |    |        | 31 | MG_517 |

**Table 9.** 31 genes that were reintroduced into at least five minimal gene sets. They are all classified as essential, apart from MG\_039, MG\_289, MG\_290, MG\_291, MG\_427, which are classified as low essential.

Of the 26 essential genes, 19 of them did not need to be reintroduced into the single gene deletion minimal gene sets (Stanford, Rockville, Rockville 2) as they had not been previously deleted. Two of these 19 genes, MG\_137 (involved in cell wall production of mycobacteria) and MG\_517 (produces fundamental components for plasma membrane stability) are specifically essential for *Mycoplasma* species, which were not identified as essential by the other, non species-specific, methodologies. Additionally, five of the 19 genes were involved in cobalt transport. Cobalt is used in the cell to produce cobalamin (otherwise known as vitamin B12), an enzyme cofactor which increases the reaction rates of DNA synthesis, fatty acid metabolism, and amino acid metabolism. This was also not identified as essential by the other design methodologies.

Interestingly, of the five low essential genes, Rockville and Bethesda did not delete four out of the five genes and Rockville 2 did not delete two of the five genes. It is likely that Bethesda did not remove the low essential genes due to the direct comparison with a closely related species, the genes with low essentiality being conserved to a greater degree than non-essential genes. We would speculate that Rockville removed less low essential genes than Rockville 2 due to Rockville using a transposon mutagenesis protocol with less precise results (cells were grown in mixed pools with DNA isolated from these mixtures rather than from isolated pure colonies of cells<sup>2323</sup>), with the low

essential genes that should have been labelled singly non-essential genes being incorrectly labelled as singly essential genes.

As could have been expected, the protocell minimal gene sets (Nashville and Fujisawa) produced the smallest genomes *in-silico* (Table 8, Figure 1), once they were made functional, but they required the most number of genes to be reintroduced. The comparative genomics minimal gene sets (Guelph, Valencia, Bethesda) produce larger genomes *in-silico* but required less genes to be reintroduced. The smaller the number of genomes compared in their design, the less genes had to be reintroduced to make dividing *in-silico* cells. Interestingly, Stanford produced a smaller *in-silico* genome than Bethesda, as the Stanford minimal gene set did not target unmodelled gene deletions (thereby not reducing the number of targeted *in-silico* gene deletions) and only required eight genes to be reintroduced.

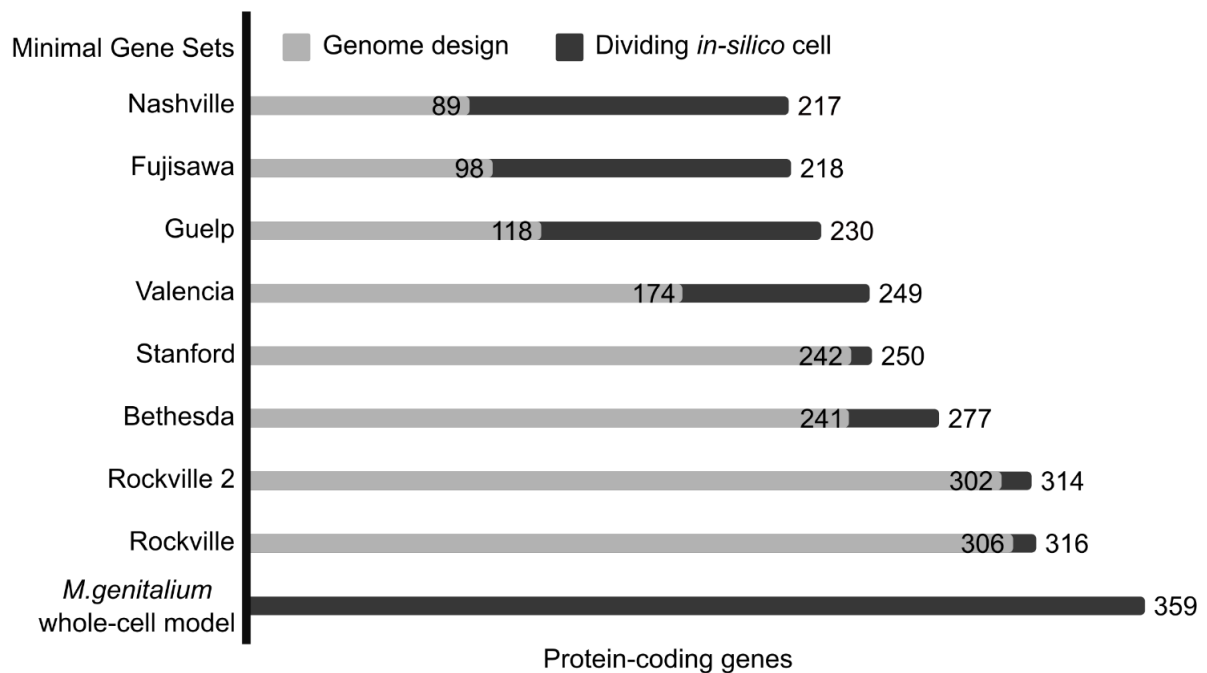

**Figure 1.** Adapting minimal gene sets from the literature to produce dividing *in-silico* cells. Minimal gene sets are shown from a range of design methodologies, produced across the past twenty years, and organised by the size of genome they produce in the whole-cell model. Original genome designs are light grey bars, genome designs with reintroduced essential and low essential genes are black bars.

## Discussion

We tested minimal gene sets from the literature <sup>3-103-10</sup> for the first time, finding that they produced *in-silico* cells that did not divide, but by reintroducing specific essential and low essential genes the sets could produce dividing *in-silico* cells.

It currently appears that there is little to be learned for minimal genome research from modelling protocell minimal gene sets in the *M.genitalium* whole-cell model, given the amount of genetic modifications required. The comparative genomics minimal gene sets are closest to producing dividing cells *in-silico* when a lower number of genomes are compared. The single gene deletion minimal gene sets required the least genes to be reintroduced, so could be considered closest to minimal genomes from the outset, but without the ability to identify low essential genes, minimal gene sets designed with this methodology will still require correcting.

The results from this work reinforce a broader trend of moving away from universal minimal genomes <sup>2121</sup> to species-specific minimal gene sets and minimal genomes, and the need to specifically identify low essential genes and their interactions.

This research has the same limitations associated with the use of the *M.genitalium* whole-cell model, and the same uncertainty around the impact of the unmodelled genes on *in-vivo* experiments, as we have stated previously <sup>2929</sup>.

This research advances minimal genome design. The computational predictions we have produced need to be tested in real life, but with the advancement of gene synthesis and genome transplantation in other *Mycoplasma* species <sup>17,26,30-33</sup>17,26,30-33 this is becoming a more realistic proposition for *Mycoplasma* researchers.

## References

1. Fleischmann, R. D. *et al.* Whole-genome random sequencing and assembly of *Haemophilus influenzae* Rd. *Science* **269**, 496–512 (1995).
2. Fraser, C. M. *et al.* THE MINIMAL GENE COMPLEMENT OF MYCOPLASMA-GENITALIUM. *Science* **270**, 397–403 (1995).
3. Mushegian, A. R. & Koonin, E. V. A minimal gene set for cellular life derived by comparison of complete bacterial genomes. *Proc. Natl. Acad. Sci. U. S. A.* **93**, 10268–10273 (1996).
4. Hutchison, C. A. *et al.* Global transposon mutagenesis and a minimal mycoplasma genome. *Science* **286**, 2165–2169 (1999).
5. Tomita, M. *et al.* E-CELL: software environment for whole-cell simulation. *Bioinformatics* **15**, 72–84 (1999).
6. Glass, J. I. *et al.* Essential genes of a minimal bacterium. *Proc. Natl. Acad. Sci. U. S. A.* **103**, 425–430 (2006).
7. Forster, A. C. & Church, G. M. Towards synthesis of a minimal cell. *Mol. Syst. Biol.* **2**, (2006).
8. Karr, J. R. *et al.* A whole-cell computational model predicts phenotype from genotype. *Cell* **150**, 389–401 (2012).
9. Huang, C. H., Hsiang, T. & Trevors, J. T. Comparative bacterial genomics: defining the minimal core genome. *Antonie Van Leeuwenhoek International Journal of General and Molecular Microbiology* **103**, 385–398 (2013).
10. Gil, R. The Minimal Gene-Set Machinery. *Reviews in Cell Biology and Molecular Medicine* (2014).
11. Gil, R., Silva, F. J., Pereto, J. & Moya, A. Determination of the core of a minimal

- bacterial gene set. *Microbiol. Mol. Biol. Rev.* **68**, 518–+ (2004).
12. Shuler, M. L., Foley, P. & Atlas, J. Modeling a minimal cell. in *Microbial Systems Biology* (ed. Navid, A.) vol. 881 573–610 (Humana Press, 2012).
  13. Glass, J. I., Merryman, C., Wise, K. S., Hutchison, C. A., 3rd & Smith, H. O. Minimal Cells-Real and Imagined. *Cold Spring Harb. Perspect. Biol.* (2017) doi:10.1101/cshperspect.a023861.
  14. Xavier, J. C., Patil, K. R. & Rocha, I. Systems Biology Perspectives on Minimal and Simpler Cells. *Microbiol. Mol. Biol. Rev.* **78**, 487–509 (2014).
  15. Mushegian, A. The minimal genome concept. *Curr. Opin. Genet. Dev.* **9**, 709–714 (1999).
  16. Fraser, C. M., Eisen, J. A. & Salzberg, S. L. Microbial genome sequencing. *Nature* **406**, 799–803 (2000).
  17. Gibson, D. G. *et al.* Complete chemical synthesis, assembly, and cloning of a *Mycoplasma genitalium* genome. *Science* **319**, 1215–1220 (2008).
  18. Dzieciol, A. J. & Mann, S. Designs for life: protocell models in the laboratory. *Chem. Soc. Rev.* **41**, 79–85 (2012).
  19. Rancati, G., Moffat, J., Typas, A. & Pavelka, N. Emerging and evolving concepts in gene essentiality. *Nat. Rev. Genet.* **19**, 34–49 (2018).
  20. Koonin, E. V. Comparative genomics, minimal gene-sets and the last universal common ancestor. *Nat. Rev. Microbiol.* **1**, 127–136 (2003).
  21. Lagesen, K., Ussery, D. W. & Wassenaar, T. M. Genome update: the 1000th genome - a cautionary tale. *Microbiology-Sgm* **156**, 603–608 (2010).
  22. Acevedo-Rocha, C. G., Fang, G., Schmidt, M., Ussery, D. W. & Danchin, A. From essential to persistent genes: a functional approach to constructing synthetic life.

- Trends Genet.* **29**, 273–279 (2013).
23. Glass, J. I. *et al.* Essential genes of a minimal bacterium. *Proc. Natl. Acad. Sci. U. S. A.* **103**, 425–430 (2006).
24. Juhas, M., Eberl, L. & Glass, J. I. Essence of life: essential genes of minimal genomes. *Trends Cell Biol.* **21**, 562–568 (2011).
25. Reich, K. A. The search for essential genes. *Res. Microbiol.* **151**, 319–324 (2000).
26. Benders, G. A. *et al.* Cloning whole bacterial genomes in yeast. *Nucleic Acids Res.* **38**, 2558–2569 (2010).
27. Hutchison, C. A. *et al.* Design and synthesis of a minimal bacterial genome. *Science* **351**, 1414–U73 (2016).
28. du Plessis, D. J. F., Nouwen, N. & Driessen, A. J. M. The Sec translocase. *Biochim. Biophys. Acta* **1808**, 851–865 (2011).
29. Rees-Garbutt, J. *et al.* Designing minimal genomes using whole-cell models. *Nat. Commun.* **11**, 836 (2020).
30. Tsampopoulos, I. *et al.* In-Yeast Engineering of a Bacterial Genome Using CRISPR/Cas9. *ACS Synth. Biol.* **5**, 104–109 (2016).
31. Karas, B. J. *et al.* Direct transfer of whole genomes from bacteria to yeast. *Nat. Methods* **10**, 410–+ (2013).
32. Gibson, D. G. *et al.* Creation of a Bacterial Cell Controlled by a Chemically Synthesized Genome. *Science* **329**, 52–56 (2010).
33. Gibson, D. G. *et al.* One-step assembly in yeast of 25 overlapping DNA fragments to form a complete synthetic *Mycoplasma genitalium* genome. *Proc. Natl. Acad. Sci. U. S. A.* **105**, 20404–20409 (2008).
34. Kanehisa, M. & Goto, S. KEGG: kyoto encyclopedia of genes and genomes.

*Nucleic Acids Res.* **28**, 27–30 (2000).

35. Apweiler, R. *et al.* UniProt: the Universal Protein knowledgebase. *Nucleic Acids Res.* **32**, D115–9 (2004).
1. Fleischmann, R. D. *et al.* Whole-genome random sequencing and assembly of *Haemophilus influenzae* Rd. *Science* **269**, 496–512 (1995).
2. Fraser, C. M. *et al.* THE MINIMAL GENE COMPLEMENT OF MYCOPLASMA-GENITALIUM. *Science* **270**, 397–403 (1995).
3. Mushegian, A. R. & Koonin, E. V. A minimal gene set for cellular life derived by comparison of complete bacterial genomes. *Proc. Natl. Acad. Sci. U. S. A.* **93**, 10268–10273 (1996).
4. Hutchison, C. A. *et al.* Global transposon mutagenesis and a minimal mycoplasma genome. *Science* **286**, 2165–2169 (1999).
5. Tomita, M. *et al.* E-CELL: software environment for whole-cell simulation. *Bioinformatics* **15**, 72–84 (1999).
6. Glass, J. I. *et al.* Essential genes of a minimal bacterium. *Proc. Natl. Acad. Sci. U. S. A.* **103**, 425–430 (2006).
7. Forster, A. C. & Church, G. M. Towards synthesis of a minimal cell. *Mol. Syst. Biol.* **2**, (2006).
8. Karr, J. R. *et al.* A whole-cell computational model predicts phenotype from genotype. *Cell* **150**, 389–401 (2012).
9. Huang, C. H., Hsiang, T. & Trevors, J. T. Comparative bacterial genomics: defining the minimal core genome. *Antonie Van Leeuwenhoek International Journal of General and Molecular Microbiology* **103**, 385–398 (2013).
10. Gil, R. The Minimal Gene-Set Machinery. *Reviews in Cell Biology and Molecular*



Medicine (2014).

11. Gil, R., Silva, F. J., Pereto, J. & Moya, A. Determination of the core of a minimal bacterial gene set. *Microbiol. Mol. Biol. Rev.* 68, 518–+ (2004).
12. Shuler, M. L., Foley, P. & Atlas, J. Modeling a minimal cell. in *Microbial Systems Biology* (ed. Navid, A.) vol. 881 573–610 (Humana Press, 2012).
13. Glass, J. I., Merryman, C., Wise, K. S., Hutchison, C. A., 3rd & Smith, H. O. *Minimal Cells-Real and Imagined*. Cold Spring Harb. *Perspect. Biol.* (2017) doi:10.1101/cshperspect.a023861.
14. Xavier, J. C., Patil, K. R. & Rocha, I. Systems Biology Perspectives on Minimal and Simpler Cells. *Microbiol. Mol. Biol. Rev.* 78, 487–509 (2014).
15. Mushegian, A. The minimal genome concept. *Curr. Opin. Genet. Dev.* 9, 709–714 (1999).
16. Fraser, C. M., Eisen, J. A. & Salzberg, S. L. Microbial genome sequencing. *Nature* 406, 799–803 (2000).
17. Gibson, D. G. et al. Complete chemical synthesis, assembly, and cloning of a *Mycoplasma genitalium* genome. *Science* 319, 1215–1220 (2008).
18. Dzieciol, A. J. & Mann, S. Designs for life: protocell models in the laboratory. *Chem. Soc. Rev.* 41, 79–85 (2012).
19. Rancati, G., Moffat, J., Typas, A. & Pavelka, N. Emerging and evolving concepts in gene essentiality. *Nat. Rev. Genet.* 19, 34–49 (2018).
20. Koonin, E. V. Comparative genomics, minimal gene-sets and the last universal common ancestor. *Nat. Rev. Microbiol.* 1, 127–136 (2003).
21. Lagesen, K., Ussery, D. W. & Wassenaar, T. M. Genome update: the 1000th genome - a cautionary tale. *Microbiology-Sgm* 156, 603–608 (2010).

22. Acevedo-Rocha, C. G., Fang, G., Schmidt, M., Ussery, D. W. & Danchin, A. From essential to persistent genes: a functional approach to constructing synthetic life. *Trends Genet.* 29, 273–279 (2013).
23. Glass, J. I. et al. Essential genes of a minimal bacterium. *Proc. Natl. Acad. Sci. U. S. A.* 103, 425–430 (2006).
24. Juhas, M., Eberl, L. & Glass, J. I. Essence of life: essential genes of minimal genomes. *Trends Cell Biol.* 21, 562–568 (2011).
25. Reich, K. A. The search for essential genes. *Res. Microbiol.* 151, 319–324 (2000).
26. Benders, G. A. et al. Cloning whole bacterial genomes in yeast. *Nucleic Acids Res.* 38, 2558–2569 (2010).
27. Hutchison, C. A. et al. Design and synthesis of a minimal bacterial genome. *Science* 351, 1414–U73 (2016).
28. du Plessis, D. J. F., Nouwen, N. & Driessen, A. J. M. The Sec translocase. *Biochim. Biophys. Acta* 1808, 851–865 (2011).
29. Rees-Garbutt, J. et al. Designing minimal genomes using whole-cell models. *Nat. Commun.* 11, 836 (2020).
30. Tsarnopoulos, I. et al. In-Yeast Engineering of a Bacterial Genome Using CRISPR/Cas9. *ACS Synth. Biol.* 5, 104–109 (2016).
31. Karas, B. J. et al. Direct transfer of whole genomes from bacteria to yeast. *Nat. Methods* 10, 410–+ (2013).
32. Gibson, D. G. et al. Creation of a Bacterial Cell Controlled by a Chemically Synthesized Genome. *Science* 329, 52–56 (2010).
33. Gibson, D. G. et al. One-step assembly in yeast of 25 overlapping DNA fragments to form a complete synthetic *Mycoplasma genitalium* genome. *Proc. Natl. Acad.*

Sci. U. S. A. 105, 20404–20409 (2008).

34. Kanehisa, M. & Goto, S. KEGG: kyoto encyclopedia of genes and genomes.

Nucleic Acids Res. 28, 27–30 (2000).

35. Apweiler, R. et al. UniProt: the Universal Protein knowledgebase. Nucleic Acids

Res. 32, D115–9 (2004).

## Methods

### Code Availability

All code created as part of this paper will be made available on Github

([github.com/squishybinary](https://github.com/squishybinary), [github.com/GriersonMarucciLab](https://github.com/GriersonMarucciLab)) under a GNU General

Public License v3.0 (gpl-3.0). For more information see

[choosealicense.com/licenses/lgpl-3.0/](https://choosealicense.com/licenses/lgpl-3.0/).

### Data Availability

The databases used to design the *in-silico* experiments, and compare the results to, includes Karr *et al.*<sup>88</sup> and Glass *et al.*<sup>66</sup> Supplementary Tables, and Fraser *et al.*

*M.genitalium* G37 genome<sup>22</sup> interpreted by KEGG<sup>34</sup> and UniProt<sup>35</sup> as strain ATCC 33530/NCTC 10195. The output .fig files for all simulations referenced will be made

available at the group's Research Data Repository (data-bris) at the University of Bristol.

### Model Availability

The *M.genitalium* whole-cell model is freely available: [github.com/CovertLab/WholeCell](https://github.com/CovertLab/WholeCell).

The model requires a single CPU and can be run with 8GB of RAM. I run the

*M.genitalium* whole-cell model on Bristol's supercomputers using MATLAB R2013b, with the model's standard settings. However, we use our own version of the

SimulationRunner.m. MGGRunner.m

([github.com/GriersonMarucciLab/Analysis\\_Code\\_for\\_Mycoplasma\\_genitalium\\_whole-cell\\_model](https://github.com/GriersonMarucciLab/Analysis_Code_for_Mycoplasma_genitalium_whole-cell_model)) is designed for use with supercomputers that start hundreds of simulations

simultaneously. It artificially increments the starting time-date value for each simulation,

as this value is subsequently used to create the initial conditions of the simulation. Our

research copy of the whole-cell model was downloaded 10th January 2017.

### *M.genitalium in-silico* Environmental Conditions

*M.genitalium* is grown *in-vivo* on SP4 media. The *in-silico* media composition is based on the experimentally characterized composition, with additional essential molecules

added (nucleobases, gases, polyamines, vitamins, and ions) in reported amounts to

support *in-silico* cellular growth. Additionally, the *M.genitalium* whole-cell model

represents 10 external stimuli including temperature, several types of radiation, and

three stress conditions. For more information see Karr *et al.* Supplementary Tables S3F, S3H, S3R<sup>88</sup>.

## Equipment

For the *M.genitalium* whole-cell model we used the University of Bristol Advanced Computing Research Centres's BlueGem, a 900-core supercomputer, which uses the Slurm queuing system, to run whole-cell model simulations.

We used a standard office desktop computer, with 8GB of ram, to write new code, and interact with the supercomputer. We used the following GUI software on Windows 7: Notepad++ for code editing, Putty (ssh software) for terminal access to the supercomputer, FileZilla (ftp software) to move files in bulk to and from the supercomputer, and PyCharm (IDE software) as an inbuilt desktop terminal and for python debugging. The command line software used included: VIM for code editing, and SSH, Rsync, and Bash for communication and file transfer with the supercomputers.

## Data Format

For the *M.genitalium* whole-cell model the majority of output files are state-NNN.mat files (Figure 2), which are logs of the simulation split into 100-second segments. The data within a state-NNN.mat file is organised into the 16 cellular variables. These are typically arranged as 3-dimensional matrices or time series, which are flattened to conduct analysis. The other file types contain summaries of data spanning the simulation. Each wild type simulation consists of 300 files requiring 0.3GB. Each gene manipulated simulation can consist of up to 500 files requiring between 0.4GB and 0.9GB. Each simulation takes 5 to 12 hours to complete in real time, 7 - 13.89 hours in simulated time.

## Data Analysis Process

For the *M.genitalium* whole-cell model, the raw data is automatically processed as the simulation ends. runGraphs.m carries out the initial analysis, while compareGraphs.m overlays the output on collated graphs of 200 unmodified *M.genitalium* simulations.

Both outputs are saved as MATLAB .fig and .pdfs, though the .pdf files were the sole files analysed. The raw .mat files were stored in case of further investigation.

Further analysis, including: analysis of genetic content and similarity, gene ontology, and identification and investigation of high and low essentiality genes and groupings, were completed manually. The GO biological process terms were downloaded from Uniprot <sup>35</sup> (strain ATCC 33530/NCTC 10195), processed by a created script

[\(\[github.com/squishybinary/Gene\\\_Ontology\\\_Comparison\\\_for\\\_Mycoplasma\\\_genitalium\\\_whole-cell\\\_model\]\(https://github.com/squishybinary/Gene\_Ontology\_Comparison\_for\_Mycoplasma\_genitalium\_whole-cell\_model\)\)](https://github.com/squishybinary/Gene_Ontology_Comparison_for_Mycoplasma_genitalium_whole-cell_model), then organised manually into tables of GO terms that were unaffected, reduced, or removed entirely by gene deletions.

```
State-N.mat
├── Chromosome
│   └── 18 sub variables, graphed: Ploidy
├── FtsZRing
│   └── 5 sub variables
├── Geometry
│   └── 9 sub variables, graphed: Pinched Diameter
├── Host
│   └── 4 sub variables
├── Mass
│   └── 9 sub variables, graphed: Total, RnaWt, ProteinWt
├── MetabolicReaction
│   └── 3 sub variables, graphed: Growth
├── Metabolite
│   └── 4 sub variables
├── Polypeptide
│   └── 4 sub variables
├── ProteinComplex
│   └── 1 sub variable
├── ProteinMonomer
│   └── 1 sub variable
├── Ribosome
│   └── 8 sub variables
├── Rna
│   └── 1 sub variable
├── RNAPolymerase
│   └── 9 sub variables
├── Stimulus
│   └── 1 sub variable
├── Time
│   └── 1 sub variable
└── Transcript
    └── 5 sub variables
```

**Figure 2.** Anatomy of a state file (*M.genitalium* whole-cell model). The data within a *state-XXX.mat* file is organised into 16 cellular variables. The variables graphed in my analysis are: Ploidy as DNA replication, Pinched Diameter as Cell Division, Total as Mass, RnaWt as RNA production, ProteinWt as Protein Production, Growth as Growth.

## Modelling Scripts

There are six scripts used to run the *M.genitalium* whole-cell model. Three are the experimental files created with each new experiment (the bash script, gene list, experiment list), and three are stored within the whole-cell model and are updated only upon improvement (MGGrunner.m, runGraphs.m, and compareGraphs.m). The bash script is a list of commands for the supercomputer(s) to carry out. Each bash script determines how many simulations to run, where to store the output, and where to store the results of the analysis. The gene list is a text file containing rows of gene codes (in the format 'MG\_XXX',). Each row corresponds to a single simulation and determines which genes that simulation should knockout. The experiment list is a text file containing rows of simulation names. Each row corresponds to a single simulation and determines the final location of the simulation output and analysis results.
